1 High dimensional geometry of fitness landscapes  
2 identifies master regulators of evolution and the  
3 microbiome

4 Holger Eble,<sup>1</sup> Michael Joswig,<sup>1,2\*</sup> Lisa Lamberti<sup>3,4</sup>, William B. Ludington<sup>5,6\*</sup>

<sup>1</sup>Chair of Discrete Mathematics/Geometry, TU Berlin, Germany

<sup>2</sup>MPI MiS Leipzig, Germany

<sup>3</sup>Department of Biosystems Science and Engineering, ETH Zürich, Basel, Switzerland

<sup>4</sup> SIB Swiss Institute of Bioinformatics, Basel, Switzerland

<sup>5</sup> Department of Embryology, Carnegie Institution for Science, USA

<sup>6</sup> Department of Biology, Johns Hopkins University, Baltimore, MD, USA

\*To whom correspondence should be addressed;

E-mail: [joswig@math.tu-berlin.de](mailto:joswig@math.tu-berlin.de), [ludington@carnegiescience.edu](mailto:ludington@carnegiescience.edu).

5

6 **A longstanding goal of biology is to identify the key genes and species that criti-**  
7 **cally impact evolution, ecology, and health. Yet biological interactions between**  
8 **genes (1, 2), species (3–6), and different environmental contexts (7–9) change**  
9 **the individual effects due to non-additive interactions, known as epistasis. In**  
10 **the fitness landscape concept, each gene/organism/environment is modeled as**  
11 **a separate biological dimension (10), yielding a high dimensional landscape,**  
12 **with epistasis adding local peaks and valleys to the landscape. Massive efforts**  
13 **have defined dense epistasis networks on a genome-wide scale (2), but these**

14 **have mostly been limited to pairwise, or two-dimensional, interactions (11).**  
15 **Here we develop a new mathematical formalism that allows us to quantify in-**  
16 **teractions at high dimensionality in genetics and the microbiome. We then**  
17 **generate and also reanalyze combinatorically complete datasets (two genetic,**  
18 **two microbiome). In higher dimensions, we find that key genes (e.g. *pykF*) and**  
19 **species (e.g. *Lactobacillus plantarum*) distort the fitness landscape, changing**  
20 **the interactions for many other genes/species. These distortions can fracture a**  
21 **“smooth” landscape with one optimal fitness peak into a landscape with many**  
22 **local optima, regulating evolutionary or ecological diversification (12), which**  
23 **may explain how a probiotic bacterium can stabilize the gut microbiome.**

## 24 **1 Introduction**

25 A fitness landscape depicts biological fitness as a function of its many underlying parts, namely  
26 genes, each as a separate dimension (10, 13, 14). Interactions between genes can change their  
27 individual impacts on fitness in a non-additive way (15), adding local peaks and valleys to  
28 the fitness landscape, which affects the evolutionary paths through the landscape (16). The  
29 mathematical frameworks to quantify biological interactions, namely epistasis, determine the  
30 degree of non-additivity, and the concept has been applied to genetics (1, 2), microbiomes (3),  
31 and ecology (4–6). In two dimensions, epistasis calculates interactions between e.g. two genes  
32 as the degree to which a double mutant phenotype can be predicted by measuring the two single  
33 mutants independently. Applying epistasis to genome-wide measurement of pairwise (17, 18)  
34 and three-way (2) genetic interactions has revealed biochemical pathways composed of discrete  
35 sets of genes as well as complex traits, such as human height, that are affected by almost every  
36 gene in the genome (19, 20). New techniques allow epistasis to be applied to broader data  
37 types (21).

38 Epistatic interactions can arise due to mutations (13, 14, 22) or when sex, recombination, and  
39 horizontal gene transfer bring groups of genes together (1, 23–26), making multiple dimensions  
40 interact simultaneously. Interactions between bacteria in the microbiome also have functional  
41 consequences (3, 27–31) and are prevalent in higher-dimensions (3, 31), where community as-  
42 sembly may introduce groups of species in different combinations e.g. in a fecal transplant.

43 Interactions in higher dimensions could change the topography of the fitness landscape (31),  
44 and their relative importance is unknown. To various extents, current approaches are limited in  
45 their ability to discern the topography of interaction landscapes in high dimensions due to (i)  
46 sign epistasis, which does not generalize well to more than two dimensions, (ii) a narrow ability  
47 to account for genomic context, and (iii) statistical considerations of the false discovery rate due  
48 to multiple testing (32, 33). Several different concepts of epistasis exist in the literature (34).  
49 However, standard epistasis frameworks often rely on parameter fitting, which brings along  
50 additional constraints (35). “Circuits”, which can describe all possible epistatic interactions  
51 (33, 36), introduce false discovery rate challenges.

52 Here we develop a new formulation of the *fitness cube* concept (10, 13, 14), where each bio-  
53 logical entity (gene, organism, environmental factor) is a separate dimension (Fig. 1a). Because  
54 the biological entities are discrete (i.e., either a bacterium is there or it is not), our framework is  
55 discrete too. The cubes represent the landscape for interactions and can be composed of many  
56 dimensions as  $n$ -dimensional hypercubes. We then develop *epistatic filtrations* to locate the  
57 epistasis on this fitness landscape. Our approach solves problems of context and sign while  
58 reducing multiple testing concerns, all in a parameter-free form that is consistent across many  
59 dimensions (Fig. 1, Box 1).

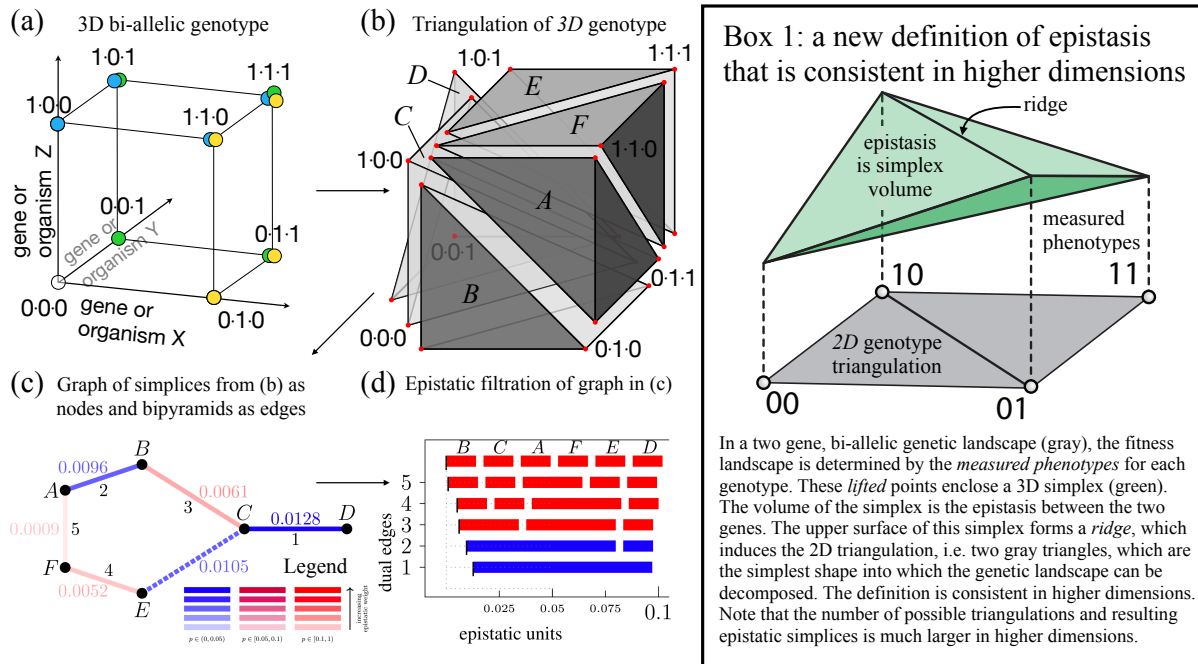

**Figure 1: Filtrations describe epistatic topography.** (a) Interacting biological entities, e.g. genes in a cell or bacterial strains in a microbiome, can be depicted as orthogonal dimensions in a unit cube, where vertices represent different genotypes or combinations of strains. (b) With 3 dimensions, the triangulation (14) of the fitness landscape produces 3D simplices (labeled A-F) of the genotypes, and 4D simplices of the fitness landscape (not shown) give the epistasis. (c) To map the global connectivity of the landscape, we merge adjacent simplices in a dual graph of the 3-cube triangulation, where nodes A-F are the simplices from (d) and the edges are the volumes of the bipyramids from the merges of neighboring simplices. The smallest bipyramid, edge 5, is formed first, followed by the next larger and so forth on up to the largest bipyramid, edge 1. The data set is from *Escherichia coli* mutations in *topA*, *spoT*, and *pykF* from (37). (c legend) Each dual edge has two parameters: its epistatic weight (indicated by shade) and its *p*-value (indicated by color). Black indices in (c) label the *critical* dual edges of  $\mathcal{S}(h)$ , where critical indicates that loss of the edge leaves nodes unconnected to the graph. (d) The sequence of merges between adjacent simplices (reading from top to bottom) shown in the dual graph is depicted by the epistatic filtration. Epistasis of the merged simplex is indicated by the thin, black vertical hatch mark on the far left bar of each row. Total width of the bars is fixed. Note the non-critical C+E merge is not depicted in the filtration because those simplices are already merged with B, A, and F.

## 60 2 Results

### 61 2.1 Defining the shapes of fitness landscapes

We first decompose the fitness cube into its most elementary parts through a triangulation (Box 1, Fig. 1b). Triangulations are used e.g. in computer vision to decompose a surface, such as a human face, into discrete parts, which are triangles. Generalizing to higher dimensions, the triangles connecting genotypes are simplices (Fig. 1b). The volume of each simplex connotes the local steepness of the landscape (Box 1). To establish the global topography of the landscape we merge adjacent simplices in a stepwise manner such that flattest parts of the landscape are merged first and the steepest parts last (Fig. 1c). Each adjacent pair of merged simplices,  $s$  and  $t$ , forms a bipyramid,  $(s, t)$  through their shared face. The **epistatic weight** of  $(s, t)$  is

$$e_h(s, t) := |\det E_h(s, t)| \cdot \frac{\text{nvol}(s \cap t)}{\text{nvol}(s) \cdot \text{nvol}(t)} . \quad (1)$$

where  $E_h(s, t)$  is the matrix specifying the vertices with their corresponding fitness phenotypes and  $\text{nvol}$  denotes the dimensionally normalized volume of the genotypes (Box 1; Appendix B1-B6). We use the notation

$$\{v^{(1)}\} + \{v^{(2)}, \dots, v^{(n+1)}\} + \{v^{(n+2)}\} \quad (2)$$

62 for the bipyramid  $(s, t)$ , where the first and last vertices are the apices and the middle set forms  
63 the shared face. The  $n+2$  genotypes of the bipyramid form a non-linear interaction of dimension  
64  $n$  when  $e_h(s, t) > 0$ .

65 We visualize the topography of the **epistatic landscape** by forming a **dual graph** of  $\mathcal{S}(h)$ ,  
66 where the nodes are the maximal simplices and adjacent simplices form the dual edges. Blue  
67 edges indicate epistasis (Fig. 1c). The **epistatic filtration** of  $h$  (Fig. 1d) depicts the path from  
68 lowest to highest epistasis by merging adjacent simplices to form a connected **cluster** c.f. (38).  
69 In this sense, epistatic filtrations encode a global notion of epistasis in higher dimensions by

70 connecting adjacent bipyramids. This method has many advantages over parameter fitting,  
71 including that it does not depend on the statistical constraints of determining a best fit.

72 Filtrations are also not constrained by the sign of epistasis, which depends on which geno-  
73 type is considered *wildtype*, a somewhat arbitrary decision given varied ancestries (see Ap-  
74 pendix B1). Studying adjacent simplices and their neighboring relationships, as we propose  
75 below, allows reconstruction of the fitness landscape and its epistatic properties in high dimen-  
76 sions. This process rests on the mathematical theory of linear optimization, convex polyhedra,  
77 and regular subdivisions (38).

78 We note that bipyramids account for the majority of genomic contexts (38), c.f. Table S1.  
79 Furthermore, the location(s) of inferred epistasis is robust to the choice of triangulation  $\mathcal{S}(h)$   
80 (38).

## 81 **2.2 An evolutionary genetics example of epistatic filtrations**

82 To illustrate our approach, we examined an existing data set from Lenski's (39) classic experi-  
83 mental evolution of *Esherichia coli*, in a set of strains with each combination of five beneficial  
84 mutations (37) (Fig. 2a). We first examine  $n = 3$  loci, corresponding to biallelic mutations in  
85 *topA*, *spoT*, and *pykF* (Fig. 1c,d). Epistasis was generally low in magnitude (37, 40), and occurs  
86 in two ways: (i) either from merging groups of groups of simplices (c.f. BC + AFE in line #2  
87 of Fig. 1d), which indicates a complex interaction, or (ii) from merging a single simplex, c.f. D,  
88 with the aggregated rest of the simplices (c.f. line #1 of Fig. 1d), much like a dominant effect in  
89 the NK model (14). This second way is consistent with a fitness landscape distortion, which oc-  
90 curs when certain mutations influence the interactions of many other genes (41). Geometrically,  
91 such a distortion constitutes a vertex split (42). We next add a fourth biallelic mutation, in the  
92 *glmUS* locus (Fig. 2b,c), encoding peptidoglycan availability, which is an essential component  
93 of the cell wall.

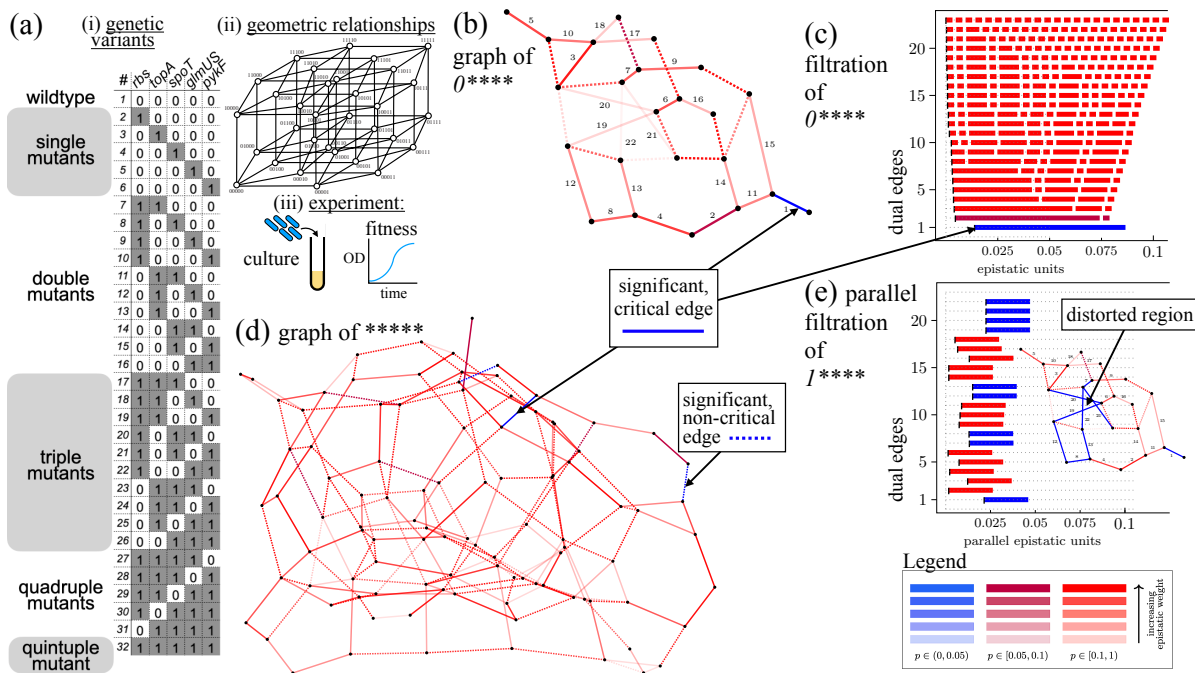

Figure 2: *E. coli* evolution is guided by epistatic landscape distortions. (a) (i) *E. coli* mutants examined (37), (ii) their geometric relationships, and (iii) experimental approach to measure fitness. (b) Edge labeled dual graph and (c) epistatic filtration restricted to  $n = 4$  mutations in *topA* (locus 2), *spoT* (locus 3), *glmUS* (locus 4) and *pykF* (locus 5). Locus 1, *rbs*, is fixed 0 (*wildtype*). Note that the left edge of the bars in (c) indicates there is very little epistatic weight added to the filtration except for the final merge, where the single genotype 00001 gives weight to the entire filtration. This final interaction corresponds to the vertices  $\{00001\} + \{00000, 01001, 00101, 00011\} + \{00010\}$ . (d) Dual graph for the complete Khan data set. Black indices in (b) label the critical dual edges of  $\mathcal{S}(h)$ . (e) In the parallel filtration, for  $1****$ , where the *rbs* mutation is present, the landscape is distorted by a concentrated area of higher epistasis. Inset: graph in (b) recolored with weights from (e).

94 The filtration reveals a smooth, additive landscape with one dominant cell where epistasis  
 95 arises only in the final merge of the filtration (Fig. 2c), meaning the epistatic topography of the  
 96 entire landscape (Fig. 2d) rests upon the single vertex, 00001, *pykF*. While the previous analysis  
 97 detected a significant, marginal effect of *pykF* (37), filtrations reveal the geometric structure  
 98 in terms of which specific combinations of loci are responsible for the effect (Fig. 2e): the  
 99 interaction between the *glmUS*,  $\{00001\}$ , and *pykF*,  $\{00010\}$ , genes requires the context of four  
 100 loci,  $\{00000, 01001, 00101, 00011\}$ , yet it involves only up to double mutants, suggesting high  
 101 dimensional epistasis that arises from lower dimensional interactions (Fig. 2c). This conclusion

102 is consistent with recent genome-wide work on trans-gene interactions (19), suggesting that  
103 complex traits may arise from genome-wide epistasis, where each mutation's contribution to  
104 the trait depends on the context of other mutations.

105 We introduced **parallel transport** (38, §6.6) to give a geometric measure of context-dependence  
106 for the same set of loci with different bystanders (e.g. species or genes) (see Fig. S1), previously  
107 examined by conditional or marginal epistasis (43). Examining the Khan data with and with-  
108 out the *pykF* mutation (37) (Fig. S2) showed increased significance in 9 out of 20 of the dual  
109 edges (Fig. S2), when *pykF* was mutated. Examining the restoration of *pykF* (Fig. S3), only  
110 3 of 22 edges changed significance and just one critical edge lost significance, indicating that  
111 the epistasis in this case occurs because the mutation causes new interactions. Thus, the *pykF*  
112 mutation appears to enable further evolution during the Lenski experiment (39) by distorting  
113 the epistatic landscape. *rbs* also generates distortions (Fig. 2e), which can be visualized as a  
114 concentrated region of epistasis on the dual graph (Fig. 2e Inset). We found similar features in  
115 another genetic data set for the  $\beta$ -lactamase enzyme (44) (Appendix B7). Filtrations can thus  
116 reveal the specific geometric structure of both the interactions and the context they rely upon.

### 117 **2.3 Lactobacilli produce microbiome distortions**

118 Up to this point, we have focused on genetic epistasis, but our framework is generalizable to  
119 interactions of environmental parameters, including the gut microbiome, for which a framework  
120 to identify complex interactions is greatly needed. Like the genome, which is composed of  
121 many genes that interact to determine organismal fitness, the microbiome is also composed of  
122 many smaller units (bacterial species in this case) that affect host fitness. Hosts are known to  
123 select and maintain a certain core set of microbes (45, 46); the interactions of these bacteria can  
124 affect host fitness (3); and it is debated to what extent these interactions are of higher-order,  
125 c.f. (28). While vertebrates have a gut taxonomic diversity of  $\approx 1000$  species, precluding study



126 of all possible combinations, the laboratory fruit fly, *Drosophila melanogaster*, has naturally  
 127 low diversity of  $\approx 5$  stably associated species (47).

128 We made gnotobiotic flies inoculated with each combination of a set of  $n = 5$  bacteria ( $2^5 =$   
 129 32 combinations) that were isolated from a single wild-caught *D. melanogaster*, consisting of  
 130 two members of the *Lactobacillus* genus (*L. plantarum* and *L. brevis*) and three members of  
 131 the *Acetobacter* genus (Fig. 3a). We measured fly lifespan, which we previously identified as a  
 132 reproducible phenotype that is changed by the microbiome (3). Overall a reduction of microbial  
 133 diversity (number of species) led to an increase in fly lifespan as with a taxonomically similar  
 134 set of bacteria we examined previously, which came from multiple hosts (3).

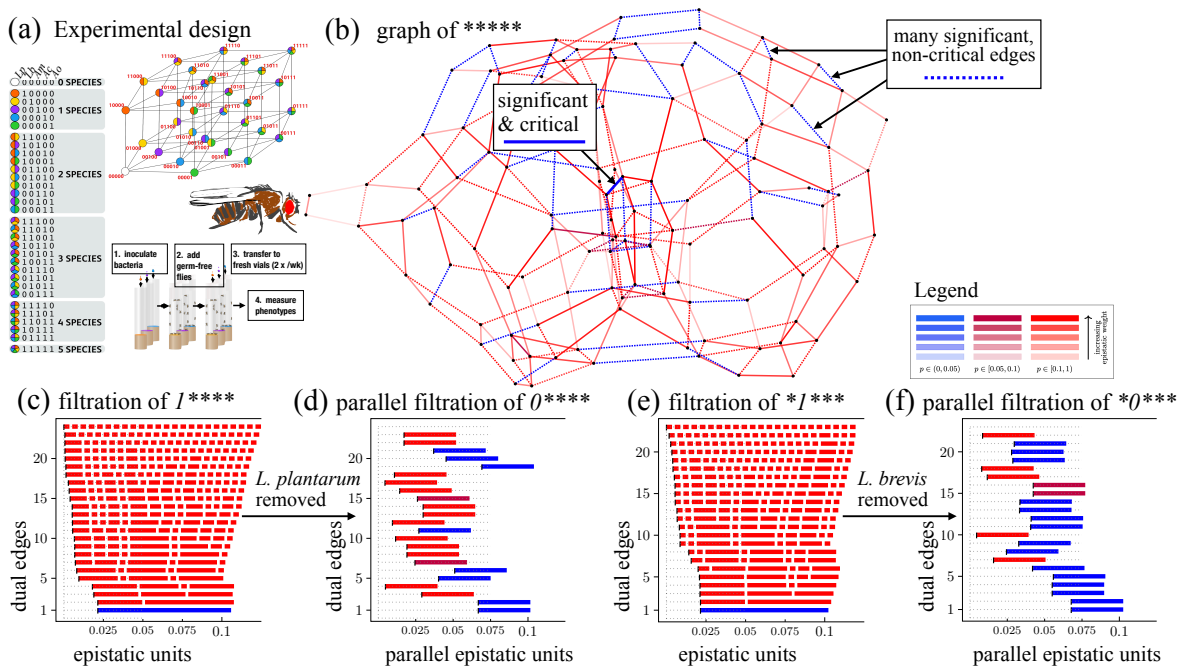

Figure 3: **Loss of lactobacilli causes global distortion of the microbiome epistatic landscape.** (a) Experimental design for Eble and Gould (3) microbiome manipulations in flies. (b) Full graph of \*\*\*\*\*, for the Eble data. (c) Filtration of  $\mathcal{S}(h)$  for the 4-face,  $1^{****}$ , of Eble data, where *L. plantarum* is present, indicates epistasis where two clusters of maximal cells merge. (d) Parallel filtration with *L. plantarum* removed shows a landscape distortion. (e) Filtration for  $*1^{****}$ , where *L. brevis* is present has similar structure to  $1^{****}$ . (f) Parallel filtration with *L. brevis* removed shows a landscape distortion.

135 Epistasis was concentrated at the center of the dual graph (Fig. 3b,c), with significant, non-

136 critical edges distributed throughout the graph (Fig. 3c). Examining the parallel transport, we  
137 found that the *Lactobacilli* drive changes in the global structure (Fig 3d,e). In 46 out of 128  
138 (36%) interactions, significance changed due to adding or removing a *Lactobacillus* (Fig 3c-  
139 f, S7, S8). These changes in significance primarily derive from non-significant interactions  
140 when *L. brevis* is present that become significant when it is removed and vice versa, indicating  
141 *L. brevis* suppresses epistatic interactions that affect fly lifespan.

142 Microbiome abundances could drive the effects on host lifespan, however, comparing the  
143 epistatic landscapes for CFUs and lifespan, we found that only 2 of 99 dual edges were sig-  
144 nificant for both the bacterial abundance and fly lifespan data sets (Fig. S9, S10, S11, S12,  
145 Tables S2, S3, S4, S5), and there was a lack of correlation between the epistatic weights of the  
146 bipyrramids (Spearman rank correlations:  $p = 0.7$ ,  $p = 0.5$ ,  $p = 0.3$ , and  $p = 0.3$  respectively).  
147 This discord between the epistatic landscapes for microbiome fitness and host fitness could e.g.  
148 diminish the rate of co-evolution.

## 149 **2.4 Interactions are sparse in higher-dimensions**

150 We used epistatic filtrations to systematically evaluate the prevalence of higher-order interac-  
151 tions as a function of the number of dimensions. Critical, significant, higher-order interactions  
152 were less frequent than pairwise interactions ( $p < 10^{-6}$ , *Z-test*) for each of the Khan, Eble,  
153 and Gould data sets, with a decreasing probability as a function of the face dimension (Table  
154 1). This occurs for three primary reasons. First, the degrees of freedom increase in higher  
155 dimensions. Second, the probability of selecting a significant interaction from the set of all pos-  
156 sible interactions decreases because the total number of interactions increases with increasing  
157 dimensions. Finally, the absolute number of significant interactions decreases in higher dimen-  
158 sions (Table 1), meaning they are biologically less prevalent. Overall,  $\approx 10\%$  of possible dual  
159 edges were significant at higher order, with  $\approx 1\%$  significant for  $n = 5$  dimensions (Table 1),

160 suggesting limits to the dimensions of biological complexity.

161 We note that these fewer interactions in high dimensions can and do impact fitness. For ex-  
162 ample, the two top 4-dimensional interactions in the Eble microbiome data produce a combined  
163 9% effect on fitness (see edges 1 and 2 in (Fig. 3)) with the largest maximal cell accounting for  
164  $\approx 5\%$ . The relative sparsity makes for a tractable number of these interactions, where we may  
165 eventually determine the mechanisms, and filtrations provide a way to identify these.

Table 1: Prevalence of interactions at different levels of complexity in genetics and microbiome data sets. Significant versus all critical dual edges ( $p < 0.05$ ).

| Interaction dimension | Dataset:<br>Khan | Dataset:<br>Eble | Dataset:<br>Gould |
|-----------------------|------------------|------------------|-------------------|
| 2:                    | 20/80 (25%)      | 24/80 (30%)      | 22/80 (28%)       |
| all higher order:     | 29/508 (5.7%)    | 58/540 (10%)     | 21/520 (4.0%)     |
| 3:                    | 21/194 (11%)     | 35/199 (17%)     | 14/194 (7.2%)     |
| 4:                    | 7/214 (3.2%)     | 22/226 (10%)     | 6/216 (2.7%)      |
| 5:                    | 1/100 (1.0%)     | 1/115 (0.8%)     | 1/110 (0.9%)      |
| total:                | 49/588 (8.3%)    | 82/620 (13%)     | 43/600 (7.1%)     |

## 166 2.5 Higher-order interactions can arise from lower-order interactions

167 Non-linearities of lower-order interactions can produce interactions in higher dimensions (40).  
168 In examining the higher-order epistasis present in our data sets, we noted that the clusters where  
169 significant epistatic weights occur are often preceded by clusters with nearly significant epistatic  
170 weights in lower dimensions (Fig. S4). We developed a graphical approach to distinguish these  
171 interactions from those that arise *de novo* (Fig. S20b,c; Appendix B11).

172 Several higher-order interactions in the Gould and Khan data could not be attributed to  
173 lower-order effects (Table S6). In particular, they could not be detected from pairwise inter-  
174 actions between loci, (c.f. Fig. S20c). As we noted, the 4-dimensional interaction in the *E.*  
175 *coli* evolution experiment involved loci with two genes (Fig. 2), whereas in the microbiome,

176 interactions involved loci with four species, indicating different underlying geometries at these  
177 different scales of biology (Table S6).

### 178 **3 Discussion and Conclusions**

179 From an evolutionary perspective, the Red Queen's hypothesis emphasizes how conflicts with  
180 other organisms can drive continuous genetic innovation (48). We find that epistasis in higher  
181 dimensions generates fitness landscape distortions, which could continuously change the fitness  
182 landscape to fuel new genomic innovation even in a static environment. This could partially  
183 explain the observation of continuous diversification in long term evolution experiments (49).  
184 In higher dimensions, we lack simple terminology to describe the many types of interactions  
185 that may occur, whether between quadruples and singles, pairs and triples, or different genetic  
186 backgrounds. We found that biologically-significant interactions in four and five dimensions are  
187 sparse and often rooted in lower order, meaning that a limited number of such interactions exist.  
188 This extends to higher dimensions the trend that 3-way interactions are often predicted from 2-  
189 way interactions (2, 3, 28). However, our finding that key genes and species cause distortions  
190 emphasizes the need to identify the significant higher-order interactions from the vast number  
191 of possible ones, a task that epistatic filtrations enable.

192 This geometric approach could be extended, e.g. to GWAS (15, 19, 50), ecosystems (4, 5),  
193 or neuronal networks (51), to discover non-additive higher-order structures at different scales.  
194 It should be noted that the polyhedral geometry methods for analyzing epistasis deserve to be  
195 developed further from the mathematical point of view. We believe that concepts of curvature  
196 for piecewise linear manifolds will be useful (52).

## 197 **4 Acknowledgements**

198 The authors acknowledge L.J. Holt and O. Brandman for insightful comments on the manuscript.  
199 Research by M.J. is carried out in the framework of Matheon supported by Einstein Foundation  
200 Berlin. Further partial support by Deutsche Forschungsgemeinschaft (SFB-TRR 109: “Dis-  
201 cretization in Geometry and Dynamics” and SFB-TRR 195: “Symbolic Tools in Mathemat-  
202 ics and their Application”. W.B.L. acknowledges NIH grant DP5OD017851, NSF IOS award  
203 2032985, and the Carnegie Institution for Science Endowment.

## 204 **5 Competing interests**

205 The authors declare no competing interests.

## 206 **6 Supplementary Materials**

207 Materials and Methods

208 Fig S1 – S22

209 Tables S1 – S9

210

## 211 **References**

- 212 1. Daniel M Weinreich, Yinghong Lan, Jacob Jaffe, and Robert B Heckendorn. The Influ-  
213 ence of Higher-Order Epistasis on Biological Fitness Landscape Topography. *Journal of*  
214 *Statistical Physics*, 172(1):208–225, feb 2018.
- 215 2. Elena Kuzmin, Benjamin VanderSluis, Wei Wang, Guihong Tan, Raamesh Deshpande,  
216 Yiqun Chen, Matej Usaj, Attila Balint, Mojca Mattiazzi Usaj, Jolanda Van Leeuwen, Eliz-  
217 abeth N Koch, Carles Pons, Andrius J Dagilis, Michael Prysxlak, Jason Zi, Yang Wang,

- 218 Julia Hanchard, Margot Riggi, Kaicong Xu, Hamed Heydari, Bryan-joseph San Luis, Er-  
219 mira Shuteriqi, Hongwei Zhu, Nydia Van Dyk, Sara Sharifpoor, Michael Costanzo, Robbie  
220 Loewith, Amy Caudy, Daniel Bolnick, Grant W Brown, Brenda J Andrews, Charles Boone,  
221 and Chad L Myers. Systematic analysis of complex genetic interactions. *Science (New*  
222 *York, NY)*, 360(April 20), 2018.
- 223 3. Alison L. Gould, Vivian Zhang, Lisa Lamberti, Eric W. Jones, Benjamin Obadia, Nikolaos  
224 Korasidis, Alex Gavryushkin, Jean M. Carlson, Niko Beerenwinkel, and William B. Lud-  
225 ington. Microbiome interactions shape host fitness. *Proceedings of the National Academy*  
226 *of Sciences*, 115(51):E11951–E11960, 2018.
- 227 4. Ted J. Case and Edward A. Bender. Testing for Higher Order Interactions. *The American*  
228 *Naturalist*, 118(6):920–929, 1981.
- 229 5. Ian Billick and Ted Case. Higher Order Interactions in Ecological Communities : What  
230 Are They and How Can They be Detected? *Ecology*, 75(6):1529–1543, 1994.
- 231 6. Jacopo Grilli, György Barabás, Matthew J Michalska-Smith, and Stefano Allesina. Higher-  
232 order interactions stabilize dynamics in competitive network models. *Nature*, pages 1–5,  
233 jul 2017.
- 234 7. Casey Beppler, Elif Tekin, Zhiyuan Mao, Cynthia White, Cassandra McDiarmid, Emily  
235 Vargas, Jeffrey H. Miller, Van M. Savage, and Pamela J. Yeh. Uncovering emergent in-  
236 teractions in three-way combinations of stressors. *Journal of the Royal Society Interface*,  
237 13(125), 2016.
- 238 8. Ivana Cvijović, Benjamin H. Good, Elizabeth R. Jerison, and Michael M. Desai. Fate of a  
239 mutation in a fluctuating environment. *Proceedings of the National Academy of Sciences*  
240 *of the United States of America*, 112(36):E5021–E5028, 2015.

- 241 9. Lauren E. Nicolaisen and Michael M. Desai. Distortions in genealogies due to purifying  
242 selection and recombination. *Genetics*, 195(1):221–230, 2013.
- 243 10. Sewall Wright. The roles of mutation, inbreeding, crossbreeding and selection in evolution.  
244 *Proceedings of the Sixth International Congress of Genetics*, 1:356–366, 1932.
- 245 11. Michael Costanzo, Anastasia Baryshnikova, Chad L Myers, Brenda Andrews, and Charles  
246 Boone. Charting the genetic interaction map of a cell. *Current opinion in biotechnology*,  
247 22(1):66–74, feb 2011.
- 248 12. Djordje Bajic, Jean C C Vila, Zachary D Blount, and Alvaro Sanchez. On the deformabil-  
249 ity of an empirical fitness landscape by microbial evolution. *Proceedings of the National*  
250 *Academy of Sciences*, 115(44):11286–11291, oct 2018.
- 251 13. John Maynard Smith. Natural selection and the Concept of a Protein Space. *Nature*,  
252 225(February 7):563–564, 1970.
- 253 14. S Kauffman and S Levin. Towards a general theory of adaptive walks on rugged landscapes.  
254 *Journal of Theoretical Biology*, 128(1):11–45, sep 1987.
- 255 15. Örjan Carlborg and Chris S Haley. Epistasis: too often neglected in complex trait studies?  
256 *Nature reviews Genetics*, 5(8):618–625, aug 2004.
- 257 16. Jeremy Van Cleve and Daniel B. Weissman. Measuring ruggedness in fitness land-  
258 scapes. *Proceedings of the National Academy of Sciences of the United States of America*,  
259 112(24):7345–7346, 2015.
- 260 17. Michael Costanzo, Anastasia Baryshnikova, Jeremy Bellay, Yungil Kim, Eric D Spear, Car-  
261 olyn S Sevier, Huiming Ding, Judice L Y Koh, Kiana Toufighi, Sara Mostafavi, Jeany Prinz,

- 262 Robert P St Onge, Benjamin VanderSluis, Taras Makhnevych, Franco J Vizeacoumar, Sol-  
263 maz Alizadeh, Sondra Bahr, Renee L Brost, Yiqun Chen, Murat Cokol, Raamesh Desh-  
264 pande, Zhijian Li, Zhen-Yuan Lin, Wendy Liang, Michaela Marback, Jadine Paw, Bryan-  
265 Joseph San Luis, Ermira Shuteriqi, Amy Hin Yan Tong, Nydia van Dyk, Iain M Wallace,  
266 Joseph A Whitney, Matthew T Weirauch, Guoqing Zhong, Hongwei Zhu, Walid A Houry,  
267 Michael Brudno, Sasan Ragibizadeh, Balázs Papp, Csaba Pál, Frederick P Roth, Guri Gi-  
268 aever, Corey Nislow, Olga G Troyanskaya, Howard Bussey, Gary D Bader, Anne-Claude  
269 Gingras, Quaid D Morris, Philip M Kim, Chris A Kaiser, Chad L Myers, Brenda J An-  
270 dreds, and Charles Boone. The genetic landscape of a cell. *Science (New York, NY)*,  
271 327(5964):425–431, jan 2010.
- 272 18. Sean R Collins, Kyle M Miller, Nancy L Maas, Assen Roguev, Jeffrey Fillingham,  
273 Clement S Chu, Maya Schuldiner, Marinella Gebbia, Judith Recht, Michael Shales, Huim-  
274 ing Ding, Hong Xu, Junhong Han, Kristin Ingvarsdottir, Benjamin Cheng, Brenda An-  
275 dreds, Charles Boone, Shelley L Berger, Phil Hieter, Zhiguo Zhang, Grant W Brown,  
276 C James Ingles, Andrew Emili, C David Allis, David P Toczyski, Jonathan S Weiss-  
277 man, Jack F Greenblatt, and Nevan J Krogan. Functional dissection of protein com-  
278 plexes involved in yeast chromosome biology using a genetic interaction map. *Nature*,  
279 446(7137):806–810, apr 2007.
- 280 19. Xuanyao Liu, Yang I Li, and Jonathan K Pritchard. Trans Effects on Gene Expression Can  
281 Drive Omnigenic Inheritance. *Cell*, 177(4):1022–1034.e6, may 2019.
- 282 20. Evan A Boyle, Yang I Li, and Jonathan K Pritchard. An Expanded View of Complex Traits:  
283 From Polygenic to Omnigenic . *Cell*, 169(7):1177–1186, jun 2017.
- 284 21. Juannan Zhou and David M. McCandlish. Minimum epistasis interpolation for sequence-  
285 function relationships. *Nature Communications*, 11(1):1782, 2020.



- 286 22. David M. McCandlish. Long-term evolution on complex fitness landscapes when mutation  
287 is weak. *Heredity*, 121(5):449–465, 2018.
- 288 23. Molly Schumer, Chenling Xu, Daniel L Powell, Arun Durvasula, Laurits Skov, Chris Hol-  
289 land, John C Blazier, Sriram Sankararaman, Peter Andolfatto, Gil G Rosenthal, and Molly  
290 Przeworski. Natural selection interacts with recombination to shape the evolution of hybrid  
291 genomes. *Science*, 360(May 11):656–660, 2018.
- 292 24. Daniel M Weinreich, Yinghong Lan, C Scott Wylie, and Robert B. Heckendorn. Should  
293 evolutionary geneticists worry about higher-order epistasis? *Current Opinion in Genetics  
294 & Development*, 23(6):700 – 707, 2013. Genetics of system biology.
- 295 25. Zachary R. Sailer and Michael J. Harms. High-order epistasis shapes evolutionary trajec-  
296 tories. *PLOS Computational Biology*, 13(5):1–16, 05 2017.
- 297 26. Michael J. McDonald, Daniel P. Rice, and Michael M. Desai. Sex speeds adaptation by  
298 altering the dynamics of molecular evolution. *Nature*, 531(7593):233–236, 2016.
- 299 27. Christoph Ratzke, Julien Barrere, and Jeff Gore. Strength of species interactions determines  
300 biodiversity and stability in microbial communities. *Nature Ecology & Evolution*, pages 1–  
301 21, feb 2020.
- 302 28. Jonathan Friedman, Logan M Higgins, and Jeff Gore. Community structure follows simple  
303 assembly rules in microbial microcosms. *Nature Publishing Group*, 1:1–7, mar 2017.
- 304 29. Deepika Sundarraman, Edouard A Hay, Dylan M Martins, Drew S Shields, Noah L Petti-  
305 nari, and Raghuv eer Parthasarathy. Quantifying multi-species microbial interactions in the  
306 larval zebrafish gut. *bioRxiv*, pages 1–23, may 2020.

- 307 30. Philippe Piccardi, Björn Vessman, and Sara Mitri. Toxicity drives facilitation between 4  
308 bacterial species. *Proceedings of the National Academy of Sciences of the United States of*  
309 *America*, 2019.
- 310 31. Alicia Sanchez-Gorostiaga, Djordje Bajić, Melisa L. Osborne, Juan F. Poyatos, and Alvaro  
311 Sanchez. High-order interactions distort the functional landscape of microbial consortia.  
312 *PLoS Biology*, 17(12):1–34, 2019.
- 313 32. Heather J. Cordell. Detecting gene-gene interactions that underlie human diseases. *Nature*  
314 *Reviews Genetics*, 10(6):392–404, 2009.
- 315 33. Niko Beerenwinkel, Lior Pachter, and Bernd Sturmfels. Epistasis and shapes of fitness  
316 landscapes. *Statist. Sinica*, 17(4):1317–1342, 2007.
- 317 34. Amy Berrington de González and D. R. Cox. Interpretation of interaction: A review. *Ann.*  
318 *Appl. Stat.*, 1(2):371–385, 12 2007.
- 319 35. Jakub Otwinowski and Joshua B. Plotkin. Inferring fitness landscapes by regression pro-  
320 duces biased estimates of epistasis. *Proceedings of the National Academy of Sciences of*  
321 *the United States of America*, 111(22), 2014.
- 322 36. Ingileif B Hallgrimsdottir and Debbie S Yuster. A complete classification of epistatic two-  
323 locus models. *BMC Genetics*, 9(1):17, jan 2008.
- 324 37. Aisha I. Khan, Duy M. Dinh, Dominique Schneider, Richard E. Lenski, and Tim F. Cooper.  
325 Negative epistasis between beneficial mutations in an evolving bacterial population. *Sci-*  
326 *ence*, 332(6034):1193–1196, 2011.

- 327 38. Holger Eble, Michael Joswig, Lisa Lamberti, and William B. Ludington. Cluster partitions  
328 and fitness landscapes of the drosophila fly microbiome. *Journal of Mathematical Biology*,  
329 May 2019.
- 330 39. Jeffrey E. Barrick and Richard E. Lenski. Genome dynamics during experimental evolution.  
331 *Nature Reviews Genetics*, 14(12):827—839, 2013.
- 332 40. Zachary R Sailer and Michael J Harms. Detecting High-Order Epistasis in Nonlinear  
333 Genotype-Phenotype Maps. *Genetics*, 205(3):1079–1088, mar 2017.
- 334 41. Hiroshi C. Ito and Akira Sasaki. Evolutionary branching in distorted trait spaces. *Journal*  
335 *of Theoretical Biology*, 489:110152, 2020.
- 336 42. Sven Herrmann and Michael Joswig. Splitting polytopes. *Münster J. Math.*, 1:109–141,  
337 2008.
- 338 43. J. L. Gill. Effects of Finite Size on Selection Advance in Simulated Genetic. *Australian*  
339 *journal of biological sciences*, 18(1508):599–617, 1965.
- 340 44. Longzhi Tan, Stephen Serene, Hui Xiao Chao, and Jeff Gore. Hidden randomness between  
341 fitness landscapes limits reverse evolution. *Phys. Rev. Lett.*, 106:198102, May 2011.
- 342 45. R E Ley, M Hamady, C Lozupone, P J Turnbaugh, R R Ramey, J S Bircher, M L Schlegel,  
343 T A Tucker, M D Schrenzel, R Knight, and J I Gordon. Evolution of Mammals and Their  
344 Gut Microbes. *Science (New York, NY)*, 320(5883):1647–1651, jun 2008.
- 345 46. Alice Risely. Applying the core microbiome to understand host–microbe systems. *Journal*  
346 *of Animal Ecology*, 89(7):1549–1558, 2020.
- 347 47. William B. Ludington and William W. Ja. *Drosophila* as a model for the gut microbiome.  
348 *PLOS Pathogens*, 16(4):1–6, 04 2020.

- 349 48. Leigh Van Valen. Molecular evolution as predicted by natural selection. *Journal of Molec-*  
350 *ular Evolution*, 3(2):89–101, 1974.
- 351 49. Benjamin H. Good, Michael J. McDonald, Jeffrey E. Barrick, Richard E. Lenski, and  
352 Michael M. Desai. The dynamics of molecular evolution over 60,000 generations. *Na-*  
353 *ture*, 551(7678):45–50, 2017.
- 354 50. Gang Fang, Wen Wang, Vanja Paunic, Hamed Heydari, Michael Costanzo, Xiaoye Liu, Xi-  
355 aotong Liu, Benjamin Vandersluis, Benjamin Oatley, Michael Steinbach, Brian Van Ness,  
356 Eric E Schadt, Nathan D Pankratz, Charles Boone, Vipin Kumar, and Chad L Myers. Dis-  
357 covering genetic interactions bridging pathways in genome-wide association studies. *Na-*  
358 *ture Communications*, 10(4274):1–18, 2019.
- 359 51. Michael W. Reimann, Max Nolte, Martina Scolamiero, Katharine Turner, Rodrigo Perin,  
360 Giuseppe Chindemi, Paweł Dłotko, Ran Levi, Kathryn Hess, and Henry Markram. Cliques  
361 of neurons bound into cavities provide a missing link between structure and function. *Fron-*  
362 *tiers in Computational Neuroscience*, 11(June), 2017.
- 363 52. John M. Sullivan. Curvatures of smooth and discrete surfaces. In *Discrete differential*  
364 *geometry*, volume 38 of *Oberwolfach Semin.*, pages 175–188. Birkhäuser, Basel, 2008.
- 365 53. Ewgenij Gawrilow and Michael Joswig. `polymake`: a framework for analyzing convex  
366 polytopes. In *Polytopes—combinatorics and computation (Oberwolfach, 1997)*, volume 29  
367 of *DMV Sem.*, pages 43–73. Birkhäuser, Basel, 2000.
- 368 54. Daniel M Weinreich, Yinghong Lan, Jacob Jaffe, and Robert B Heckendorn. The influence  
369 of higher-order epistasis on biological fitness landscape topography. *Journal of statistical*  
370 *physics*, 172(1):208–225, 2018.

- 371 55. Jesús A. De Loera, Jörg Rambau, and Francisco Santos. *Triangulations*, volume 25 of  
372 *Algorithms and Computation in Mathematics*. Springer-Verlag, Berlin, 2010. Structures  
373 for algorithms and applications.
- 374 56. Daniel M Weinreich, Nigel F Delaney, Mark A Depristo, and Daniel L Hartl. Darwinian  
375 evolution can follow only very few mutational paths to fitter proteins. *Science (New York,*  
376 *NY)*, 312(5770):111–114, apr 2006.
- 377 57. Deepika Sundarraman, Edouard A. Hay, Dylan M. Martins, Drew S. Shields, Noah L. Petti-  
378 nari, and Raghuv eer Parthasarathy. Higher-order interactions dampen pairwise competition  
379 in the zebrafish gut microbiome. *mBio*, 11(5):1–15, 2020.
- 380 58. Kabir Husain and Arvind Murugan. Physical Constraints on Epistasis. *Molecular Biology*  
381 *and Evolution*, 2020.
- 382 59. Andrés Aranda-Díaz, Benjamin Obadia, Ren Dodge, Tani Thomsen, Zachary F. Hallberg,  
383 Zehra Tüzün Güvener, William B. Ludington, and Kerwyn Casey Huang. Bacterial inter-  
384 species interactions modulate pH-mediated antibiotic tolerance. *eLife*, 9, 2020.
- 385 60. E. D. Weinberger. Fourier and taylor series on fitness landscapes. *Biological Cybernetics*,  
386 65(5):321–330, 1991.
- 387 61. Gareth James, Daniela Witten, Trevor Hastie, and Robert Tibshirani. *An Introduction to*  
388 *Statistical Learning: With Applications in R*. Springer Publishing Company, Incorporated,  
389 2014.
- 390 62. Niko Beerenwinkel, Lior Pachter, Bernd Sturmfels, Santiago F. Elena, and Richard E.  
391 Lenski. Analysis of epistatic interactions and fitness landscapes using a new geometric  
392 approach. *BMC Evolutionary Biology*, 7(1):60, Apr 2007.

- 393 63. E. D. Weinberger. Fourier and Taylor series on fitness landscapes. *Biological Cybernetics*,  
394 65(5):321–330, 1991.
- 395 64. Hye-Yeon Lee, Shin-Hae Lee, Ji-Hyeon Lee, Won-Jae Lee, and Kyung-Jin Min. The role  
396 of commensal microbes in the lifespan of *Drosophila melanogaster*. *Aging*, 11(13):4611–  
397 4640, 2019.

398

399

400

401

Supplementary Materials for:  
High dimensional geometry of fitness landscapes  
identifies master regulators of evolution and the  
microbiome

402

Holger Eble,<sup>1</sup> Michael Joswig,<sup>1,2\*</sup> Lisa Lamberti<sup>3,4</sup>, William B. Ludington<sup>5,6\*</sup>

<sup>1</sup>Chair of Discrete Mathematics/Geometry, TU Berlin, Germany

<sup>2</sup>MPI MiS Leipzig, Germany

<sup>3</sup>Department of Biosystems Science and Engineering, ETH Zürich, Basel, Switzerland

<sup>4</sup> SIB Swiss Institute of Bioinformatics, Basel, Switzerland

<sup>5</sup> Department of Embryology, Carnegie Institution for Science, USA

<sup>6</sup> Department of Biology, Johns Hopkins University, Baltimore, MD, USA

\*To whom correspondence should be addressed;

E-mail: [joswig@math.tu-berlin.de](mailto:joswig@math.tu-berlin.de), [ludington@carnegiescience.edu](mailto:ludington@carnegiescience.edu).

403

## 404 **A Materials and Methods**

### 405 **A.1 Fly husbandry**

406 Flies were reared germ-free and inoculated with one combination of bacteria on day 5 after eclo-  
407 sion.  $N \geq 100$  flies were assayed for lifespan in  $n \geq 5$  independent vials per bacterial combination  
408 for a total of 3200 individual flies. Food was 10% autoclaved fresh yeast, 5% filter-sterilized  
409 glucose, 1.2% agar, and 0.42% propionic acid, pH 4.5. Complete methods are described in  
410 Gould *et al* (3).

### 411 **A.2 Bacterial cultures**

412 Bacteria were cultured on MRS or MYPL, washed in PBS, standardized to a density of  $10^7$   
413 CFU/mL and 50  $\mu$ L was inoculated onto the fly food. Strains are indicated in Table S7. See  
414 Gould *et al* (3) for complete methods.

### 415 **A.3 Genetics data**

416 Existing genetics data sets were gotten from Sailer and Harms 2017 (40) github repository  
417 (<https://github.com/harmlab/epistasis>) or from Tan *et al* (44).

418 For the Khan data in Fig. 2, the fitness function  $h$  is defined for (b) by assigning the follow-  
419 ing normalized values to the 16 genotypes:

00000  $\mapsto$  0.1524    01000  $\mapsto$  0.1745    00100  $\mapsto$  0.1689    00010  $\mapsto$  0.1569  
420 00001  $\mapsto$  0.1528    01100  $\mapsto$  0.1842    01010  $\mapsto$  0.1756    01001  $\mapsto$  0.1823  
00110  $\mapsto$  0.1718    00101  $\mapsto$  0.1810    00011  $\mapsto$  0.1642    01110  $\mapsto$  0.1836  
01101  $\mapsto$  0.1956    01011  $\mapsto$  0.1858    00111  $\mapsto$  0.1813    01111  $\mapsto$  0.1987 .

421 The Tan data set is different from the other fitness values in that only median and mean  
422 values are given, meaning we cannot compute  $p$ -values to assess the statistical significance. The  
423 fitness values are minimum inhibitory concentrations of antibiotics from a well-standardized  
424 assay with little experimental variation. Thus, the measurements and our analysis are believed to



425 be robust. We note that the regular subdivision resulting from the corresponding height function  
426 of  $[0, 1]^5$  is degenerate in the sense that it is not a triangulation. This degeneracy arises because  
427 the data are discrete antibiotic concentrations with 24 possible values. The repetition of exact  
428 values in several cases means a triangulation does not occur. We extended our methods to this  
429 degenerate case by restricting the analysis to the faces that do have a triangulation, broadening  
430 the application of our approach. We focused on the piperacillin with clavulanate data from (44)  
431 as it is the better behaved.

#### 432 **A.4 Computational analysis**

433 The filtrations code is available as a `polymake` (53) package (cf. <https://github.com/holgereble/EpistaticFiltration>) and the analysis pipeline is available as a  
434 `jupyter` notebook.

## 436 **B Terminology**

437 **Loci** (singular **locus**) refer to individual sites in the genome where a mutation may occur, or in  
438 the microbiome sense, a locus is a particular bacterial species. We write  $[n] := \{1, \dots, n\}$  for  
439 the set of all loci.

440 **Genotypes**,  $v = (v_1, \dots, v_n)$ , are vectors of loci with 0/1-coordinates that form points in  
441 some fixed Euclidean space  $\mathbb{R}^n$ , where  $n$  is the number of genetic loci or bacterial species  
442 considered. In this article we focus on **biallelic**  $n$ -locus systems, i.e. genotype sets of the form  
443  $V = \{0, 1\}^n$  where  $n$  is the number of loci and each locus is either 0, absent, or 1, present.  
444 For instance,  $v = (1, 0, 1)$  denotes a genotype in a 3-locus system  $\mathbb{R}^3$ , where the first and third  
445 loci are mutant and the second is wild type. The set of all genotypes will be denoted by  $V$ .  
446 The convex hull  $P := \text{conv}(V)$  of all genotypes is called the **genotope**. In our setting  $P$  is the  
447  $n$ -dimensional unit cube  $[0, 1]^n$  (c.f. (Fig. S21) for a 2D projection of  $[0, 1]^5$ ).

448 A **fitness function** (also called **height function**) associates to each genotype  $v \in V$  a quan-  
449 tified **phenotype** describing the impact of the genotype on the organism. For example, if the  
450 measured phenotype is fitness,  $h$  encodes the reproductive output of the genotype.

451 The **fitness landscape** is the pair  $(V, h)$ , which defines the fitness  $h(v)$  for each genotype  
452  $v \in V$ . Let  $v = (v_1, \dots, v_n) \in V$  be a genotype. Then its **lift** is given by  $(v, h(v)) =$   
453  $(v_1, \dots, v_n, h(v)) \in \mathbb{R}^{n+1}$ .

454 A set of points  $W = \{w^{(1)}, \dots, w^{(\ell)}\}$  is **affinely independent** if for all real scalars  $\lambda_i$   
455 satisfying  $\sum_{i=1}^{\ell} \lambda_i = 0$  the condition  $\sum_{i=1}^{\ell} \lambda_i w^{(i)} = 0$  forces  $\lambda_i = 0$  for all  $i \in \{1, \dots, \ell\}$ .  
456 Otherwise  $W$  is **affinely dependent**.

457 An **interaction** with respect to a fitness function  $h$  occurs between a collection of  $k + 2$   
458 affinely dependent genotypes  $v^{(1)}, \dots, v^{(k+2)} \in V \subset \mathbb{R}^n$ , for  $k \leq n$ , whose lifts are affinely  
459 independent points in  $\mathbb{R}^{n+1}$ . This is in line with the standard concept of additive epistasis. The  
460 number  $k$  is the **dimension** of the interaction; throughout we assume that  $k \geq 2$ .

Let  $U = \{v^{(1)}, \dots, v^{(\ell)}\}$  be a set of genotypes. Its **support** is the set

$$\text{supp}(U) := \left\{ k \in [n] \mid \text{there are distinct } 1 \leq i, j \leq \ell \text{ with } v_k^{(i)} \neq v_k^{(j)} \right\} .$$

461 That is, the support is the set of loci where at least two of the given genotypes differ. For  
462 example, if  $n = 3$  and  $U = \{(0, 0, 0), (1, 0, 1), (1, 0, 0)\}$  then  $\text{supp}(U) = \{1, 3\}$ .

463 The number of loci that vary (0 vs 1) in the support is called the **order** of an interac-  
464 tion; this definition agrees with, c.f., (54): “We designate interactions among any subset of  
465  $k$  mutations as  $k$ th-order epistasis.”. We give two examples: First, let  $n = 2$  and  $U =$   
466  $\{(0, 0), (0, 1), (1, 0), (1, 1)\} = V$  such that  $U$  is an interaction with respect to some fitness  
467 function. Then  $U$  is an interaction of dimension 2 and order 2. Second, let  $n = 3$  and  
468  $U = \{(0, 0, 0), (0, 1, 1), (1, 0, 0), (1, 1, 1)\}$  such that, again,  $U$  is an interaction with respect to  
469 some height function. Then the dimension is 2 and the order is 3. In general, the order is at least

470 as large as the dimension, but the two quantities may differ. We say that genes (corresponding  
471 to loci) **interact** if they form the support set of an interaction of genotypes.

472 **Remark.** The dimension  $k$  of an interaction  $v^{(1)}, \dots, v^{(k+2)}$  with respect to some fitness func-  
473 tion agrees with the dimension of the affine span of the given points in  $\mathbb{R}^n$ . This can be seen  
474 as follows. By definition the lifted points  $(v^{(1)}, h(v^{(1)})), \dots, (v^{(k+2)}, h(v^{(k+2)}))$  are affinely in-  
475 dependent in  $\mathbb{R}^{n+1}$ . So their affine span has dimension  $k + 1$ . As  $v^{(1)}, \dots, v^{(k+2)}$  are affinely  
476 dependent, the dimension of their affine span is at most  $k$ . Now the affine dimension can only  
477 increase by at most one if one coordinate is appended.

## 478 **B.1 A primer on epistatic filtrations**

479 We first explain the biallelic case with  $n \geq 2$  loci. In the geometric framework (33), two in-  
480 teracting loci give rise to four possible genotypes, which form the vertices of a square and may  
481 be written as vectors of zeros and ones, indicating the absence (0, wildtype) or the presence (1,  
482 mutant) of each locus respectively (Fig. 1b) (33,38). The measured phenotypes lift the genotype  
483 vertices into 3-space, and there is epistasis corresponding to the volume of the simplex enclosed  
484 by the lifted points (see blue simplex in Fig. 1b). Geometrically, the four genotypes involved  
485 are fully symmetric, meaning that the sign of the epistasis for  $n = 2$  is relative to the choice of  
486 a coordinate system. Thus, the sign of epistasis depends on which genotype is considered wild-  
487 type. By considering the simplex volume rather than the fold of the upper shell of the simplex,  
488 epistatic filtrations do not specify a sign and thus avoid this caveat. However, directionality is  
489 considered by parallel transport (see later section). Returning to our explanation, by taking the  
490 upper convex hull of all  $2^n$  lifted points and projecting back onto the genotype  $[0, 1]^n$  we induce  
491 a **subdivision**  $\mathcal{S}(h)$ ; cf. (38, 55, §2.1), into **maximal cells** (Fig. 1b). Generically, every maximal  
492 cell of  $\mathcal{S}(h)$  is an  $n$ -dimensional simplex, which is the convex hull of  $(n + 1)$  affinely indepen-  
493 dent genotypes (Fig. 1c). Importantly, these  $n$ -dimensional simplices are the most elementary

494 parts into which a fitness landscape can naturally be decomposed.

Our framework generalizes to higher dimensions through a geometric shape called a **bipyramid**, where two satellite vertices, each the apex of one pyramid, are joined to a common set of base vertices. The satellites correspond in the  $2D$  example (Fig. 1b) to 00 and 11 and the base to 10 and 01. This is naturally associated with  $\mathcal{S}(h)$ , set up by the **ridge** (Fig. 1b). For an ordered sequence of  $n + 2$  genotypes  $(v^{(1)}, v^{(2)}, \dots, v^{(n+2)})$  we let

$$s = \text{conv}\{v^{(1)}, \dots, v^{(n+1)}\} \quad \text{and} \quad t = \text{conv}\{v^{(2)}, \dots, v^{(n+2)}\} .$$

In other words,  $s$  and  $t$  form convex hulls. We call such a pair  $(s, t)$  a bipyramid with vertices  $v^{(1)}, v^{(2)}, \dots, v^{(n+2)}$ . Then we can find the volume of the lifted bipyramid by forming the  $(n + 2) \times (n + 2)$ -matrix

$$E_h(s, t) := \begin{pmatrix} 1 & v_{1,1} & v_{1,2} & \dots & v_{1,n} & h(v^{(1)}) \\ 1 & v_{2,1} & v_{2,2} & \dots & v_{2,n} & h(v^{(2)}) \\ \vdots & \vdots & \vdots & \vdots & \vdots & \vdots \\ 1 & v_{n+2,1} & v_{n+2,2} & \dots & v_{n+2,n} & h(v^{(n+2)}) \end{pmatrix} , \quad (3)$$

where  $v_{i,1}, v_{i,2}, \dots, v_{i,n}$  are the coordinates of  $v^{(i)} \in \mathbb{R}^n$ . The **epistatic weight** of the bipyramid  $(s, t)$  is

$$e_h(s, t) := |\det E_h(s, t)| \cdot \frac{\text{nvvol}(s \cap t)}{\text{nvvol}(s) \cdot \text{nvvol}(t)} . \quad (4)$$

Here  $\text{nvvol}$  denotes the dimensionally normalized volume. The quantity  $\text{nvvol}(s \cap t)$  is the relative  $(n-1)$ -dimensional normalized volume of the **ridge** of the bipyramid, given by the intersection  $s \cap t = \text{conv}(v^{(2)}, \dots, v^{(n+1)})$ . We use the notation

$$\{v^{(1)}\} + \{v^{(2)}, \dots, v^{(n+1)}\} + \{v^{(n+2)}\} \quad (5)$$

495 for the bipyramid  $(s, t)$ , where the first and last vertices are the satellites and the middle set  
 496 forms the base. Now the  $n + 2$  genotypes of the bipyramid form an interaction of dimension  $n$   
 497 when  $e_h(s, t) > 0$ .

498 In our regular triangulation  $\mathcal{S}(h)$ , the two  $n$ -dimensional simplices,  $s$  and  $t$ , are **adjacent**  
499 because their intersection  $s \cap t$  is a common face of dimension  $n - 1$ .

## 500 **B.2 Constructing a filtration from the epistasis of adjacent simplices**

501 We visualize the topography of the **epistatic landscape** by forming a **dual graph** of  $\mathcal{S}(h)$ ,  
502 where the nodes are the maximal simplices and adjacent simplices form the dual edges. A  
503 rugged path is one with more blue edges (Fig. 1d). To each such dual edge we associate an  
504 epistatic weight and a label (Fig. 1c, epistatic weights are in shades of blue and red, while  
505 labels are in black). In this way, we construct an epistatic landscape that corresponds to the  
506 underlying fitness landscape with the ruggedness specified along the dual graph. The **epistatic**  
507 **filtration** of  $h$  (Fig. 1e) depicts the path from weakest to highest epistasis by merging adja-  
508 cent simplices. These diagrams summarize the information contained in epistatic weights and  
509 dual graphs, and facilitate comparisons across data sets. But there is important new informa-  
510 tion contained in epistatic filtrations, which is not directly visible from the dual graph and its  
511 epistatic weights. Indeed, a step in the epistatic filtration merges adjacent simplices. We build  
512 the complete fitness landscape by stepwise merging of maximal cells, starting from the lowest  
513 epistatic weight and stepwise merging adjacent simplices to form a connected **cluster** c.f. (38).  
514 In this sense, epistatic filtrations encode a global notion of epistasis in higher dimensions by  
515 connecting adjacent bipyramids.

516 To see this, notice that each row of the diagram has a number of bars and a black leftmost  
517 line. In the top row the black line marks the epistatic weight of zero ( $x$ -coordinate). Each bar  
518 is red and corresponds to one maximal simplex of  $\mathcal{S}(h)$ . In the second row (counting from the  
519 top), we see three things: (1) the value of the lowest epistatic weight moves the  $x$ -coordinate  
520 of the black line slightly to the right. (2) The two maximal simplices of  $\mathcal{S}(h)$  corresponding to  
521 this epistatic weight are merged into one. These correspond to the two bars in the previous row

522 above the new, longer bar in the row. The lengths of the other bars remain unchanged but are  
523 shifted horizontally by the epistatic weight in (1). (3) The statistical significance of the epistatic  
524 weight giving rise to the merging step, encoded by the colors of the bars; cf. Section B.4.

525 The merging procedure is then repeated for each pair of maximal simplices arising in each  
526 epistatic weight until one reaches the highest epistatic weight and the last maximal simplex of  
527  $\mathcal{S}(h)$  to be merged with the rest. In this way the indentation of the bar charts increases from top  
528 to bottom. The total width of the bars stays constant throughout.

529 Importantly, in the epistatic filtration diagram, not every merging step is displayed; e.g.,  
530 in Fig. 1d there are fewer rows than dual edges in Fig. 1c. This is because some steps do not  
531 change the resulting fitness landscape (no actual new portion is merged to the previous one). The  
532 reported steps are only the ones increasing the connected components of the fitness landscape  
533 obtained from the previous merging steps. The epistatic weights corresponding to these steps  
534 are the edges in the dual graph which we call **critical** in (38, §.3.2).

### 535 **B.3 Normalized epistatic weights**

536 To gain a perspective on the generality of higher-order interactions, it is desirable to compare  
537 epistatic landscapes. Different phenotypes have different metrics, making comparisons difficult  
538 for current approaches to epistasis. Filtrations are well-suited in this sense. Scaling the height  
539 function  $h$  by a positive constant does not change the regular triangulation, and thus it does not  
540 change the dual graph. In order to compare different data sets, we scale the height function to  
541 Euclidean norm one. The epistatic weights are scaled accordingly. The resulting **normalized**  
542 **epistatic weights** are measured in **epistatic units**, giving a generalized metric for epistasis.

543 Measuring the effect of context on epistatic interactions is also desirable, e.g. to detect the  
544 marginal or conditional effects of a locus (37), and these are a natural feature of filtrations. If  
545 we fix some  $k$  loci and let the remaining  $n - k$  loci vary, we obtain a height function, which is

546 **restricted** to a face of the genotype  $[0, 1]^n$ . That face has  $2^{n-k}$  vertices, and it is an isomorphic  
547 copy of the cube  $[0, 1]^{n-k}$ . For instance, if  $n = 5$  and we fix the first and the fourth locus to 0,  
548 we obtain a 3-dimensional face, which we denote  $0**0*$ . That is, such a face is written as a  
549 string of  $n$  symbols in the alphabet  $\{0, 1, *\}$ , where 0 or 1 mark the fixed choices, and  $*$  stands  
550 for variation. The number of  $*$  symbols equals the dimension of the face. Triangulations, their  
551 dual graphs, epistatic weights, etc. are well-defined for height functions restricted to faces. This  
552 aspect of the theory allows the study of conditional epistatic effects.

#### 553 **B.4 Statistics of epistatic weights**

554 We developed a statistical test to quantify the significance of an interaction associated with a  
555 fixed bipyramid; cf. (38, §4.2). Here we assume that  $h(v)$  is the mean value of the individual  
556 phenotype measurements for some number of replicated experiments for the fixed genotype  $v$ .  
557 To each dual edge we associate a  $p$ -value, which is independent of the epistatic weight nor-  
558 malization. If that  $p$ -value is below 0.05 we call that dual edge **significant**. It is useful to also  
559 consider  $p$ -values, which are slightly higher because one can use the shape of the landscape  
560 to identify interesting locations for further statistical analysis. To this end we call a dual edge  
561 **semi-significant** if  $0.05 \leq p < 0.1$ .

562 While it may be possible that this approach misses some biologically relevant interactions  
563 (e.g. if they do not correspond to a bipyramid selected by our method), those interactions that  
564 we identify carry information that is robust and supported by a statistical model. The fact that  
565 not all possible interactions can be approached is an inevitable consequence of the higher di-  
566 mensional nature of fitness landscapes, also reflected by a very high number of possible regular  
567 triangulations of  $[0, 1]^n$ . That number equals 74 for  $n = 3$  and 87,959,448 for  $n = 4$ , whereas  
568 the precise numbers for  $n \geq 5$  are unknown; cf. (55, §6.3). Thus, filtrations use the data to  
569 greatly condense the number of possible interactions considered.

570 The bar colorings in the filtrations of epistatic weights, as in (Fig. S4), reflect the outcome  
571 of multiple simultaneous statistical tests (one for each epistatic weight) (38).

572 Significant dual edges at  $p < 0.05$  are shown in blue,  $0.05 \leq p < 0.1$  in purple, and  $p \geq 0.1$   
573 in red.

574 It may happen that a triangulation has a significant dual edge, which is not critical, whence  
575 it does not show in the epistatic filtration. In that case the next critical dual edge becomes blue;  
576 so a filtration encodes all significant interactions found by our method.

577 **Remark.** By funneling the analysis through the concept of regular triangulations our approach  
578 pre-selects interactions, which are most relevant with respect to fitness (38, §2.2). Via this major  
579 deviation from (33) we are able to detect interactions in many data sets, which are biologically  
580 plausible; this suggests strongly that our method is particularly good at avoiding false positives.  
581 Future work will investigate the relationship to other methods from statistics and signal pro-  
582 cessing. While most of this is beyond the scope of the present study, in Appendix B12 we offer  
583 a first step by comparing with traditional linear regression approaches.

## 584 **B.5 A synthetic experiment examining how epistatic weights change as a** 585 **function of the interaction order**

586 Our method calculates significance of detected interactions and normalizes the epistatic weight  
587 to the volume of the unit cube of the same dimensionality. We used synthetic data to analyze the  
588 method performance. We first examined 468 synthetic filtrations over the 4-dimensional cube,  
589 producing 10011 critical dual edges. We found that the epistatic weight is indeed constant as a  
590 function of the interaction order, see (Fig. S19a). This indicates that the normalization method  
591 is effective. Furthermore, the number of significant interactions decreased as the standard de-  
592 viation of the input data increased, indicating the statistical method is sensitive to noise, see  
593 (Fig. S19b).



## 594 B.6 A microbiome example in dimension 4

595 Here  $n = 4$ , and the fitness function  $h$  is defined by assigning the following values to the 16  
596 genotypes:

$$\begin{aligned} 0000 &\mapsto 0.2484; & 1000 &\mapsto 0.2320; & 0100 &\mapsto 0.1618; & 0010 &\mapsto 0.1698; \\ 0001 &\mapsto 0.1943; & 1100 &\mapsto 0.1749; & 1010 &\mapsto 0.1714; & 1001 &\mapsto 0.1929; \\ 0110 &\mapsto 0.1668; & 0101 &\mapsto 0.1608; & 0011 &\mapsto 0.1617; & 1110 &\mapsto 0.1643; \\ 1101 &\mapsto 0.1677; & 1011 &\mapsto 0.1715; & 0111 &\mapsto 0.1613; & 1111 &\mapsto 0.1594. \end{aligned}$$

The vertices  $U := \{v^{(1)}, \dots, v^{(6)}\} \in V$  given by

$$\begin{aligned} v^{(1)} &= (1, 1, 0, 0); & v^{(2)} &= (0, 0, 0, 0); & v^{(3)} &= (1, 0, 0, 0); \\ v^{(4)} &= (1, 1, 0, 1); & v^{(5)} &= (1, 1, 1, 1); & v^{(6)} &= (1, 0, 0, 1) \end{aligned}$$

597 form a bipyramid  $(s, t)$  consisting of 4-dimensional simplices  $s$  and  $t$  as above. The simplices  
598  $s$  and  $t$  correspond to nodes in the dual graph of  $\mathcal{S}(h)$  that share a dual edge recording their  
599 adjacency relation as indicated in (Fig. 3b).

In this situation, equation (4) reads

$$e_h(s, t) = \begin{vmatrix} 1 & 1 & 1 & 0 & 0 & 0.1749 \\ 1 & 0 & 0 & 0 & 0 & 0.2484 \\ 1 & 1 & 0 & 0 & 0 & 0.2320 \\ 1 & 1 & 1 & 0 & 1 & 0.1677 \\ 1 & 1 & 1 & 1 & 1 & 0.1594 \\ 1 & 1 & 0 & 0 & 1 & 0.1929 \end{vmatrix} \cdot \frac{\text{nvols}(s \cap t)}{\text{nvols}(s) \cdot \text{nvols}(t)} = 0.0318 \cdot \frac{\sqrt{2}}{1 \cdot 1} \approx 0.045.$$

600 Since  $e_h(s, t) > 0$ , the genotype set  $U$  defines a 4-dimensional interaction with full support  
601  $\{1, 2, 3, 4\}$  and of order 4, according to our terminology of Section Terminology. With a  $p$ -  
602 value of  $0.0005 < 0.05$  the significance test established in (38, §.4) rejects the zero hypothesis  
603 for  $e_h(s, t)$  and therefore proves the effect of the interaction  $U$  to be significant. We indicate this  
604 fact with the color **blue** both in the dual graph of  $\mathcal{S}(h)$  in (Fig. 3b) and in the epistatic filtration  
605 of  $h$  in (Fig. 3c).

606 This example illustrates the following fact of biological interest. For the bacterial com-  
607 binations  $v^{(1)}, v^{(2)}, \dots, v^{(6)}$  fitness, given by the fitness function  $h$ , varies significantly in a

608 non-linear way.

## 609 **B.7 The epistatic landscape within a single enzyme is rugged**

610 As a point of comparison with the Khan data set, we re-analyzed data from a fully factorial  
611 5-mutation data set in the  $\beta$ -lactamase gene, where each mutation is in a separate residue of the  
612 same enzyme (44, 56). Due to a lack of the raw replicate data, our computations are based on  
613 the reported mean values, and  $p$ -values are not calculated. The filtration holds a high magnitude  
614 of epistasis (Fig. S5, S6) compared with the Khan data set (Fig. S4, S2); note magnitude on the  
615  $x$ -axis. The epistasis arises in many steps (note slope of filtration on left side; (Fig. S5, S6)),  
616 consistent with the low number of possible evolutionary paths observed by Weinreich (56),  
617 and distortions are apparent in the shifted magnitude of epistasis by parallel transport. Our  
618 geometric approach also reveals a tiered structure to the epistasis, c.f. the largest weight merges  
619 two clusters of simplices (Fig. S5, S6), indicating a more complex epistatic landscape than the  
620 Khan data set, where epistasis came from one individual simplex on the periphery of the dual  
621 graph.

622 Examining the filtration (Fig. 3d), the epistatic weight (i.e. magnitude) for the microbiome  
623 data generated  $\approx 5\%$  effect, roughly three times the weight in the Khan data and half that in  
624 the Tan  $\beta$ -lactamase landscapes (44) (c.f.  $x$ -axis between Fig. 3, S4, S5), indicating that the  
625 rugosity of microbiome interactions is comparable to genetic ones.

626 To further compare the global effect of context across different datasets, we developed a  
627 method to compute epistasis, based on the triangulation of dual landscapes, which we call the  
628 epistatic product [Appendix *Product model for epistatic landscape rugosity*] (Fig. S13, S14,  
629 S15, S16, S17, S18). The total epistasis was highest for the  $\beta$ -lactamase experiment (44), which  
630 carries much higher context-dependence than either the microbiome (3) or *E. coli* evolution data  
631 sets (37), indicative of overall high epistasis at the smallest, within enzyme, scale.

## 632 **B.8 Interactions are sparse in higher-dimensions**

633 The prevalence and importance of higher-order interactions is debated, with some studies sug-  
634 gesting pairwise interactions predict the vast majority of interactions in complex communi-  
635 ties (28), and others suggesting a large influence of context-dependent effects (3) (57), which  
636 would make higher-order interactions unpredictable. As we showed in the previous section, few  
637 such interactions are biologically meaningful in the context of fitness.

638 This limitation on epistasis in higher dimensions could arise due to e.g. limited phenotypic  
639 dimensions where interactions can be detected or to a lower dimensional manifold that absorbs  
640 the majority of the effects (58) (e.g. lifespan and fecundity are anti-correlated, making fitness  
641 robust to changes in one or the other). Regardless, our analysis shows that significant epistatic  
642 interactions are increasingly sparse as the number of dimensions for interaction increase, indi-  
643 cating there exist some limits to biological complexity.

644 We analyzed the few higher-order interactions in greater detail using a geometric approach.  
645 As we noted previously, the interactions in the Khan genetic data (Table 1) are based on a vertex  
646 split of the genotype 00001, meaning that the entire epistatic weight of the landscape is balanced  
647 by a single maximal cell (Fig. 2).

In contrast, the epistatic filtration of the Eble microbiome data in (Fig. 3) has a much richer texture. There are two significant bipyramids

$$\begin{aligned} \{01001\} + \{00000, 01000, 01101, 01111\} + \{01100\} & 0.0451 \quad \#2 \\ \{01001\} + \{00000, 01000, 01011, 01111\} + \{01110\} & 0.0485 \quad \#1 \end{aligned}$$

given with their epistatic weights and edge id's, which form a cluster of interactions, indicat-  
ing a larger topographic feature in the epistatic landscape that relates the interactions between  
*L. brevis* and increasing numbers of *Acetobacters*. Proximal to these significant cells are two  
cells with nearly significant statistical support:

$$\begin{aligned} \{01011\} + \{00000, 01001, 00111, 01111\} + \{01101\} & \#8 \\ \{01011\} + \{00000, 01000, 01001, 01111\} + \{01101\} & \#7 \end{aligned}$$

648 with their edge id's (Fig. 3). This invites further research on the bacteria involved. For instance,  
649 the interactions could derive from metabolic crossfeeding between the *Acetobacters*, which  
650 produce many co-factors, and *L. brevis*, which produces lactate, stimulating *Acetobacter* growth  
651 (59). Note that the support sets of the bipyramids for all four interactions contain both the wild  
652 type 00000 and 01111, which are the maximum and minimum fitness respectively.

## 653 **B.9 Parallel transport of epistatic weights**

654 The notion of parallel transport in a fitness landscape  $(V, h)$  was introduced in (38, §6.6) as  
655 a way to compare geometric and biological information between pairs of parallel facets of the  
656 convex polytope  $\text{conv } V$ . In this work, we extended that notion to include the case of two fitness  
657 landscapes,  $(V, h_1)$  and  $(V, h_2)$ , associated to different generic and normalized height functions  
658  $h_i : V \rightarrow \mathbb{R}, i \in \{1, 2\}$ , defined on the same vertex set  $V = \{0, 1\}^n$  for some  $n \in \mathbb{N}$ . To  
659 enable meaningful comparisons, we assume that each  $h_i$  is normalized and that there is a larger  
660 fitness landscape  $(W, h)$  with a generic and normalized height function  $h : W \rightarrow \mathbb{R}$  restricting  
661 to  $h_1$  and  $h_2$  on the parallel facets  $V$  in  $W$ , such that the partition of  $\text{conv } W$  induced by  $h$   
662 is compatible with the one of  $\text{conv } V$  induced by  $h_1$ , resp. by  $h_2$ . In this setting, we define  
663 **normalized epistatic weights** as with Eq. (4) with  $h$  the normalized height function and  $s, t$   
664 any adjacent simplices forming a bipyramid.

Parallel transports enable us to transport epistatic filtrations along the reflection map

$$\phi: V \rightarrow V; v = (v_1, v_2, \dots, v_n) \mapsto (v'_1, v'_2, \dots, v'_n) ,$$

665 with  $v'_i = 1 - v_k$  if  $i = k$  and  $v'_i = v_i$  otherwise. More precisely, let  $e_{h_1}(s, t)$  be the normalized  
666 epistatic weight associated to a bipyramid of  $\mathcal{S}(h_1)$  and let  $\phi(e_{h_1}(s, t)) := e_{h_2}(\phi(s), \phi(t))$  be  
667 the parallel normalized epistatic weight transported by  $\phi$ . Then the filtration of normalized  
668 epistatic weights induces a filtration of parallel normalized epistatic weights. Additionally, to  
669  $e_{h_1}(s, t)$  and to  $\phi(e_{h_1}(s, t))$  a  $p$ -value can unambiguously be associated (38, §4.1-4.2). Notice

670 that by design epistatic filtrations for  $\mathcal{S}(h_1)$  only show normalized epistatic weights associated  
671 to critical dual edges, defined as in (38). But normalized epistatic weights and their significance  
672 can be defined for all bipyramids including the ones associated to noncritical dual edges. This  
673 explains the labelling of the parallel transport tables below. There a row is numbered only if  
674 the bipyramid corresponds to a critical dual edge in the dual graph of  $\mathcal{S}(h_1)$ . Noncritical dual  
675 edges whose normalized epistatic weight remains non-significant after the parallel transport are  
676 omitted. The normalized epistatic weight before (denoted by  $e_o = e_{h_1}(s, t)$ ) and after (denoted  
677 by  $e_p = \phi(e_{h_1}(s, t))$ ) the parallel transport, as well as their  $p$ -values (denoted by  $p_o$  and  $p_p$ ) are  
678 also reported, as well as ratios of these quantities.

679 These parallel transport tables are linked to the epistatic filtration diagrams. Indeed, each  
680 numbered row in the table corresponds to the row in the epistatic filtration diagram with the  
681 black line set at  $e_o$ . It also corresponds to the row with black line set at  $e_p$  in the parallel  
682 transported filtration diagram.

683 Recall from Section *Statistics of epistatic weights* that there may be dual edges of the tri-  
684 angulations which are significant but not critical. Since only the critical dual edges are labeled  
685 (by the row number in the epistatic filtration), in our tables for parallel transport these show up  
686 as unlabelled rows.

687 Examples for the parallel transport of epistatic filtrations are shown in Figures S1, S2,  
688 S3, S5, and S6. The magnitude of the epistasis in the left panels are roughly comparable  
689 between data sets due to normalization of the input data. Compare each left panel with its  
690 corresponding right panel to observe the relative change in epistasis in the parallel path. Larger  
691 changes in epistasis indicate stronger context-dependence of the interaction. For instance, in  
692 the first Weinreich comparison (Fig. S5), bar 10 in the right panel has a parallel epistasis greater  
693 than the original filtration on the left, indicating context-dependence.

## 694 **B.10 Product model for epistasic landscape rugosity**

695 In this section we offer a new methodological framework to simultaneously study fitness land-  
 696 scapes associated to different height functions. We also provide a measure to quantify how  
 697 much the height function of the combined fitness landscape differs from the sum of the height  
 698 functions.

699 Let  $U$  and  $V$  be point configurations in  $\mathbb{R}^m$  and  $\mathbb{R}^n$ , respectively. We think of these point  
 700 configurations as two sets of genotypes, which may be distinct or not. If we have height func-  
 701 tions  $\lambda : U \rightarrow \mathbb{R}$  and  $\mu : V \rightarrow \mathbb{R}$ , then taking the sum  $\lambda + \mu$  point-wise yields a lifting function  
 702 of the product  $U \times V \subset \mathbb{R}^{m+n}$ . The cells of the regular subdivision  $\mathcal{S}_{U \times V}(\lambda + \mu)$  are products of  
 703 cells of  $\mathcal{S}_U(\lambda)$  with cells of  $\mathcal{S}_V(\mu)$ . In particular, if  $\lambda$  and  $\mu$  are generic, i.e.,  $\mathcal{S}_U(\lambda)$  and  $\mathcal{S}_V(\mu)$   
 704 are triangulations, then the cells of  $\mathcal{S}_{U \times V}(\lambda + \mu)$  are products of simplices.

Now we consider an arbitrary height function  $\nu : U \times V \rightarrow \mathbb{R}$  on the product of the point configurations. This yields height functions

$$\nu_U : U \rightarrow \mathbb{R}, u \mapsto \frac{1}{\ell} \sum_{v \in V} \nu(u, v) \quad \text{and} \quad \nu_V : V \rightarrow \mathbb{R}, v \mapsto \frac{1}{k} \sum_{u \in U} \nu(u, v),$$

705 where  $k = \#U$ ,  $\ell = \#V$ ,  $u$  is a vertex in  $U$  and  $v$  is a vertex in  $V$ .

Further we define

$$\nu' : U \times V, (u, v) \mapsto \nu(u, v) - \nu_U(u) - \nu_V(v) .$$

Observe that

$$(\lambda + \mu)_U(u) = \lambda(u) + \frac{1}{\ell} \sum_{v \in V} \mu(v) \quad \text{and} \quad (\lambda + \mu)_V(v) = \mu(v) + \frac{1}{k} \sum_{u \in U} \lambda(u) ,$$

706 and  $(\lambda + \mu)'$  is the height function with constant value  $-\left(\frac{1}{k} \sum_{u \in U} \lambda(u) + \frac{1}{\ell} \sum_{v \in V} \mu(v)\right)$ . Thus  
 707  $\lambda + \mu$  and  $(\lambda + \mu)_U + (\lambda + \mu)_V$  induce the same regular subdivision of  $U \times V$ . Therefore,  
 708 we propose to analyze the height function  $\nu'$  to measure how much  $\nu$  deviates from the sum of

709 two height functions. We can use the techniques from our previous paper (38) and apply (all  
710 of) them to  $\mathcal{S}_{U \times V}(\nu')$  for any given  $\nu$ . For instance, this allows to measure how independent  
711 two different height functions are on the same point set (this is the case  $U = V$ ). We say that  $\nu$   
712 **decomposes as a product** if  $\nu' = 0$ .

713 **Example 1.** If  $U = V = \{0, 1\}$  are the vertices of the unit interval then  $U \times V$  are the vertices  
714 of the unit square  $[0, 1]^2$ . Analyzing  $\mathcal{S}(\nu')$  for any given height function  $\nu$  on the four points  
715  $(0, 0)$ ,  $(0, 1)$ ,  $(1, 0)$  and  $(1, 1)$  gives back the standard basic example of additive epistasis.

716 **Remark.** Two observations are in order: In (38, §6.6) we considered a version of parallel  
717 transport to compare epistatic effects, see also Appendix B9. The connection to the product  
718 model approach is as follows. Let  $V = \{0, 1\}^n$ , i.e., the vertex set of the  $n$ -dimensional unit  
719 cube, be embedded twice, into a pair of parallel facets of the unit  $(n+1)$ -cube  $[0, 1] \times [0, 1]^n$ .  
720 This occurs in the product model with  $U = \{0, 1\}$ . If a height function  $\nu$  on  $\{0, 1\} \times U$   
721 decomposes as a product then the parallel transport (in both directions) is trivial. Note that the  
722 number of dimensions is greater for the product model than for the parallel transport.

723 Additionally, observe that the product model differs from the marginal epistasis framework,  
724 which would produce a single number testing if the mutant changes one specific interaction  
725 between the genes.

### 726 **B.10.1 Product model for the Khan data**

727 To illustrate the product model consider the following example from the Khan data. We are  
728 interested in detecting if interactions between the *topA*, *spoT*, and *pykF* genes change when the  
729 *rhs* gene is mutated. To answer this question we let  $U$  and  $V$  be 3-cubes inside  $[0, 1]^5$  defined  
730 by three mutable loci, one for each of the above genes and indicated by  $*$ , and two fixed loci.  
731 The first fixed locus represents the *rhs* gene. It is not mutated in  $U$  and mutated in  $V$ . The  
732 height functions are compared over the three variable loci. Thus the filtration over the product

733 model for  $U$  and  $V$  has four dimensions in this case. A computation reveals that there are no  
734 significant dual edges in the epistatic filtration on product model, see (Fig. S13). This indicates  
735 that the *rhs* mutant does not affect the interaction landscape.

## 736 **B.11 Meta-epistatic charts**

737 This section deals with the question to which extent higher order epistatic effects are induced by  
738 lower dimensional ones or, put in other terms, which lower dimension epistatic effects can be  
739 seen in higher dimension. The **meta-epistatic chart** is a diagram drawn on top of the induced  
740 epistatic filtrations for some selection of faces of a fixed cube; higher-order interactions induced  
741 by lower order interactions are marked as corresponding.

742 In (Fig. S20b) and (Fig. S20c) we exhibit an example for the Eble data set, with 5 loci, where  
743 we take the five 4-dimensional faces  $0****$ ,  $*0***$ ,  $**0**$ ,  $***0*$  and  $****0$  into consideration.  
744 Mathematically, these five 4-faces constitute the face figure of the wild type. Fix one 4-face, say  
745  $0****$ . The induced epistatic filtration on this face shows two blue bars corresponding to dual  
746 edges labeled 1 and 2. Each of them refers to the ridge of a bipyramid, which is a 3-dimensional  
747 simplex in this case. These two ridges may intersect certain 3-dimensional faces in the right  
748 dimension and thus may or may not descend to significant ridges within certain 3-dimensional  
749 filtrations. In case of an incidence with a lower dimensional significant ridge, the significant  
750 4-dimensional effect is induced by a lower dimensional effect and one may picture this fact as  
751 a directed assignment pointing from the lower towards the higher dimensional interaction.

## 752 **B.12 Comparison with a simple linear regression approach**

753 In the theory of fitness landscapes many linear regression approaches have been proposed to  
754 study higher-order interactions, c.f. (21, 34, 40, 60). In this section, we compare our epistatic  
755 weight method to an elementary regression approach using an example from the data.



The regression analysis we have in mind assumes that there is a linear relationship between the predictors  $X_1, X_2, \dots, X_n$  (one associated to each locus/dimension of the genotype) and response, or dependent, variables  $Y$  (associated to the biological measurements). That is, one assumes that  $Y = f(X_1, X_2, \dots, X_n) + \epsilon$  where  $f : \mathbb{R}^n \rightarrow \mathbb{R}; (X_1, X_2, \dots, X_n) \mapsto \beta_0 + \beta_1 X_1 + \beta_2 X_2 + \dots + \beta_n X_n$  and where  $\epsilon$  is a random error term. The coefficients  $\beta_1, \beta_2, \dots, \beta_n$  are unknown but can be estimated by minimizing the sum of squared residuals associated to the observations pairs  $(x, y)$ . These observations pairs consisting of a genotype and a measurement associated to it. Notice that more than one measurements are typically associated to a single genotype. With the coefficient estimates one can make predictions for the dependent variable via

$$\hat{y} = \hat{\beta}_0 + \hat{\beta}_1 x_1 + \hat{\beta}_2 x_2 + \dots + \hat{\beta}_n x_n . \quad (6)$$

756 The hat symbol  $\hat{\cdot}$  indicates a prediction, for instance of  $Y$  on the basis of  $x_i = X_i$ , or an estimate  
757 for an unknown coefficient.

758 Below, we are interested in the differences between the observed measurements  $y$  associated  
759 to the genotypes of  $[0, 1]^n$ , expressed in terms of  $x_1, x_2, \dots, x_n$  and the predicted values  $\hat{y}$  on  
760 the regression hyperplane (6). Notice that the regression analysis remains unchanged after  
761 normalizing the height function to Euclidean norm one. Additionally, computing residues for  
762 all replicated measurements (when provided) and then take averages builds on the assumption  
763 that measurements associated to different genotypes are statistically independent from each  
764 other. This assumption is consistent with the one underlying the computation of statistical  
765 significances for epistatic weights, following (38, §. 4.2-4.3).

766 **Remark.** In the regression setting of (6) there are hypothesis tests (like the  $F$ -statistic,  $t$ -  
767 statistics and  $p$ -value) to answer if at least one regression coefficient  $\beta_j, 1 \leq j \leq n$  is nonzero,  
768 see for example (61). Such statistical approaches are different from the one in (38, §. 4.2-4.3),  
769 where other hypothesis tests for each epistatic weight were proposed.

### 770 **B.12.1 Regression for Eble data**

771 In the following, we perform a regression analysis focusing on the replicated measurements for  
772 the lifespan fitness landscape on  $[0, 1]^5$  obtained from Eble and subspaces thereof. Numerical  
773 measures of model fit ( $F$ -statistic: 2357, with  $p$ -value essentially zero, and for 3840 obser-  
774 vations and 5 predictors) show that the multiple linear regression model can be considered to  
775 be appropriated for this data. Since the epistatic weights of the dual edges are close to zero  
776 ( $\leq 0.02$ ) and are mostly not significant, the above regression analysis conclusion is in line with  
777 what we see from the filtration of epistatic weights associated to the same fitness landscapes,  
778 see (Fig. S22).

779 From this example we see that the regression approach provides some general information  
780 on higher-order interactions. However, without further assumptions, only one interaction for-  
781 mula is given in terms of a regression hyperplane (6) while the epistatic weight approach gives  
782 more fine grained information. This example also illustrate that when the regression model fits  
783 the data well (essentially the higher the  $F$ -statistics and the more coefficients in the hyperplane  
784 equation are significantly non-zero) the epistatic filtration has little horizontal shifts and few  
785 significant epistatic weights.

We now proceed repeating the above analysis on some of the bipyramids considered in the  
parallel analysis for the normalized lifespan Eble data. Regressing over bipyramid 23 in Table  
S8

$$\{0001\} + \{0000, 1001, 1011, 0111\} + \{1111\}$$

786 in  $0****$  and  $1****$  reveals that only two average residues over  $0****$  are non-zero (associated  
787 to the microbiomes 00000 and 00001), and only one is non-zero over  $1****$  (associated to the  
788 microbiome 10000). This confirms the two non significant epistatic weights over bipyramid 23  
789 in Table S8.

790 **Remark.** If minimally dependent sets of points in the genotope are fixed, as in the epistatic  
791 weight approach, and one regresses above these points, then the corresponding regression hy-  
792 perplanes equations are learned from data and the equations generally differ from the epistatic  
793 weights given as in (4), but similar biological and geometric conclusions can be drawn. This  
794 idea could then be taken further by considering smoothing splines, instead of linear regression,  
795 and their relation to epistatic filtrations. From an application point of view, one would obtain  
796 an interesting new extension of the concept of epistasis because intermediate genotypes could  
797 be assessed, which would correspond to the case of genetically heterogeneous populations of  
798 organisms as occur in nature.

799 Other numerical results for the above regressions are summarized in Table S9. Over 0\*\*\*\*  
800 two coefficients are significantly non-zero (for  $x_1$  and  $x_4$ ), see top part of Table S9. Similarly,  
801 over 1\*\*\*\* four coefficients are significantly non-zero ( $x_1, x_2, x_3, x_4$ ), see bottom part of Table  
802 S9. The fit of the linear regression models is confirmed by the relatively high values of the  
803  $F$ -statistic. Over 0\*\*\*\* $v$  the  $F$ -statistics is 459.1 for a  $p$ -value near zero and 720 observations.  
804 Over 1\*\*\*\* the corresponding  $F$ -statistics (near zero) is 52.61.

### 805 **B.13 Comparison with other approaches**

806 Currently the main lines of research to investigate higher-order epistasis in computational bi-  
807 ology and related disciplines include the present methods, inspired from discrete polyhedral  
808 geometry (3, 33, 38, 62); linear regression approaches, c.f. (21); methods originating from har-  
809 monic analysis, c.f. (40, 54, 63); and using correlations between the effects of pairwise muta-  
810 tions, discussed in (38).

811 In a 2-locus, biallelic system, all these methods can easily be recovered from one another;  
812 some of them even agree. This is true also for some ecological approaches, including the gener-  
813 alized Lotka-Voleterra equations, which yield a mathematically equivalent form to epistasis for

814 certain situations c.f. see equation 9 of (4). In higher dimensional systems, these methods re-  
815 main conceptually closely related but they generally yield different insights about the problem,  
816 such as whether the interactions are significant, what their magnitude is, and what their sign  
817 is. Because these previous methods make specific, *a priori* assumptions about the forms of in-  
818 teractions, they are limited by these assumptions. Epistatic filtrations add a global perspective,  
819 determining the structure of interactions from the shape of the fitness landscape.

## 820 **B.14 Microbiome data sets**

821 In this work, *Drosophila* microbiome fitness landscapes consist of experimental measurements  
822 on germ-free *Drosophila* flies inoculated with different bacterial species. The lifespan of ap-  
823 proximately 100 individual flies were measured for each combination of bacterial species, giv-  
824 ing roughly 3,200 individual fly lifespans for each of the two data sets presented. The experi-  
825 mental methods are described in (3, 64). The first data set is the exact data presented in (3, 64).  
826 The second data set is the second set of species with exactly the same methods used in (3, 64).  
827 The bacterial compositions considered consist of all possible combinations of five species. The  
828 species considered can all occur naturally in the gut of wild flies: *Lactobacillus plantarum*  
829 (LP), *Lactobacillus brevis* (LB), *Acetobacter pasteurianus* (APa), *Acetobacter tropicalis* (AT),  
830 *Acetobacter orientalis* (AO), *Acetobacter cerevisiae* (AC), *Acetobacter malorum* (AM). The 5-  
831 member communities both stably persist in the fly gut. For the purposes of this work, we define  
832 **stable** as maintaining colonization of the gut when  $\leq 20$  flies are co-housed in a standard fly  
833 vial and transferred daily to fresh food containing 10% glucose, 5% live yeast that has sub-  
834 sequently been autoclaved, 1.2% agar, and 0.42% propionic acid, with a pH of 4.5. The total  
835 number of species found stably associated with an individual fly is typically between 3 and 8.  
836 Consistently, *Lactobacillus plantarum* and *Lactobacillus brevis*, are found with two to three  
837 *Acetobacter* species. Less consistently, species of *Enterobacteria* and *Enterococci* occur, and

838 these have been described as pathogens. While more strains may be present, for each of the two  
839 data sets in the present work, a set of five non pathogen species was chosen, including the two  
840 *Lactobacilli* and three *Acetobacter* species. The combinations of species are shown in Table S7.  
841 Different strains of the same species were used in the two data sets.

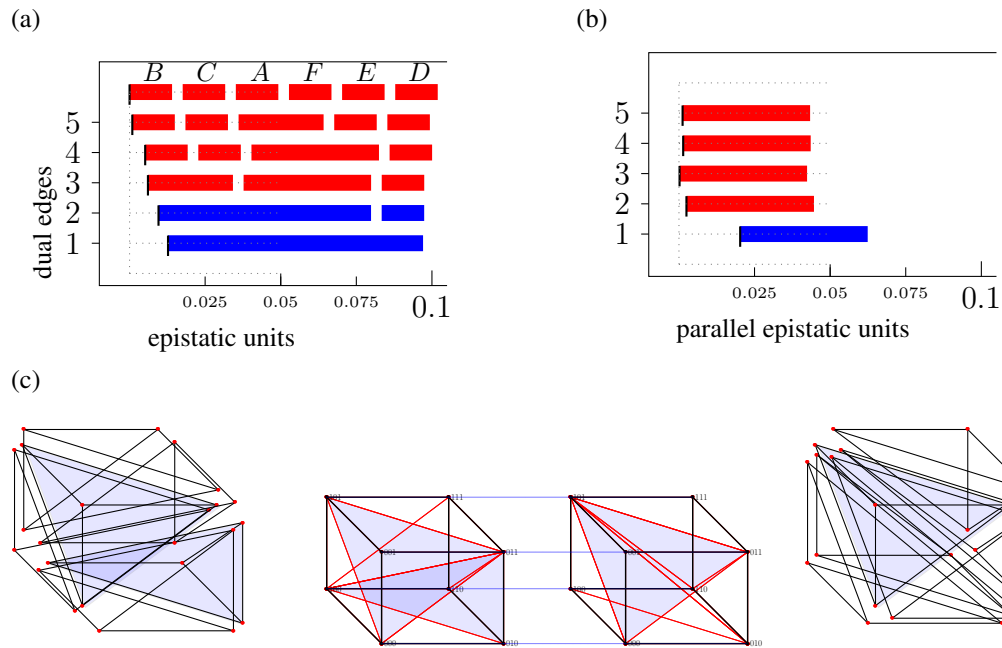

Figure S1: **Parallel transport from  $0^{**}0^*$  to  $1^{**}0^*$  within the Khan dataset.** (a) Filtration based on the triangulation of  $0^{**}0^*$ . (b) Parallel epistatic weights computed from  $1^{**}0^*$  for the triangulation based on  $0^{**}0^*$ . (c) The two parallel triangulations (and exploded copies) are depicted. The partitions in the node set are transferred from the cube on the middle left to the cube on the middle right. Exploded versions of these same triangulation on the far left and far right demonstrate the geometry of the simplices generated by the triangulations.

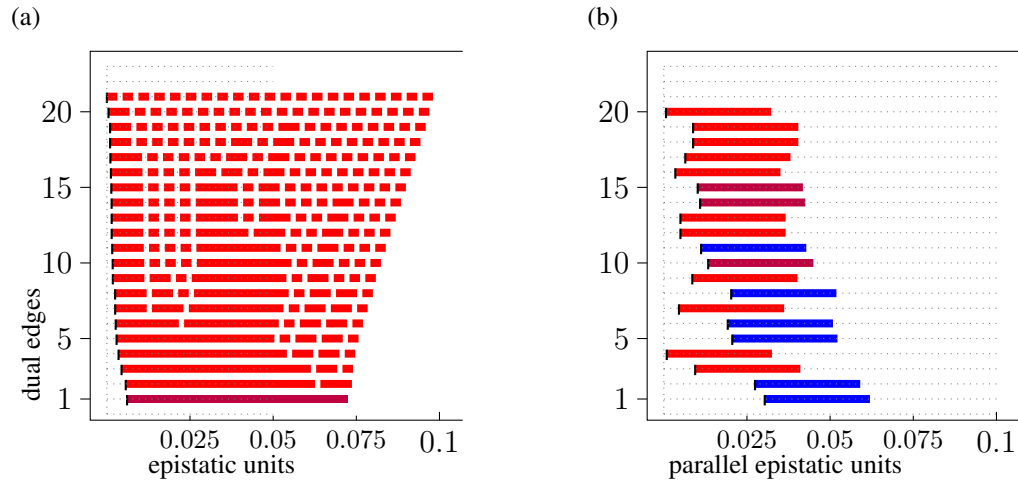

Figure S2: Epistatic filtration and parallel epistatic units for transport from \*\*\*\*0 to \*\*\*\*1 within the Khan data.

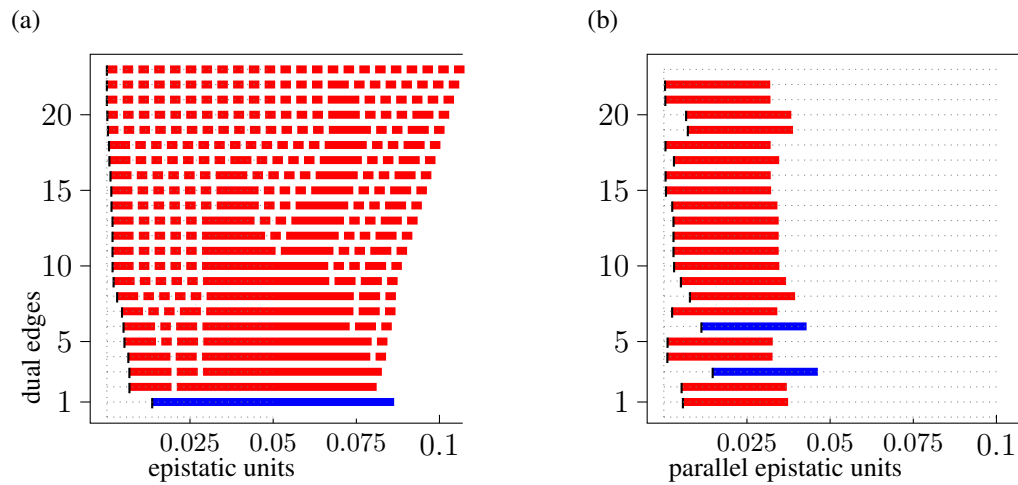

Figure S3: Epistatic filtration and parallel epistatic units for transport from \*\*\*\*1 to \*\*\*\*0 within the Khan data.

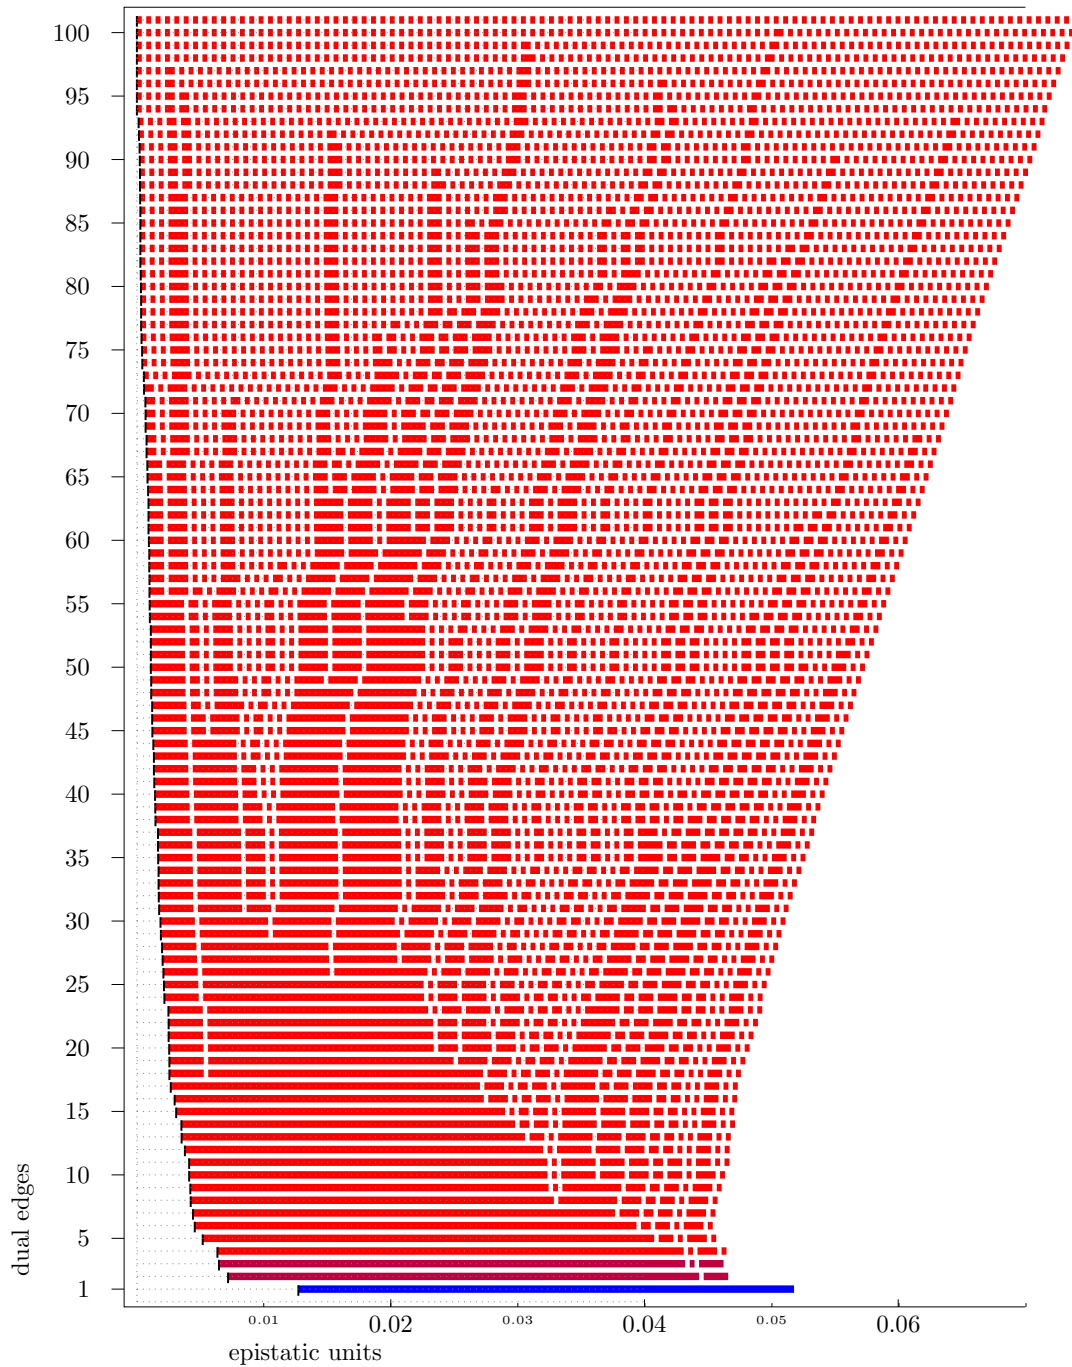

Figure S4: Complete filtration of the Khan data over the whole 5-cube.



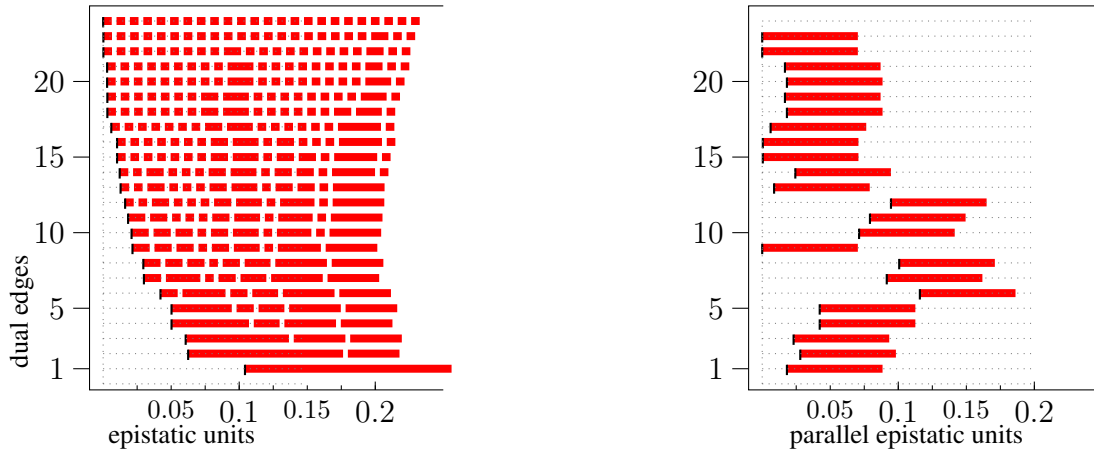

Figure S5: Parallel transport from 0\*\*\*\* to 1\*\*\*\* within the Tan data. Analysis based on mean values only; hence there is no color coding for the significance.

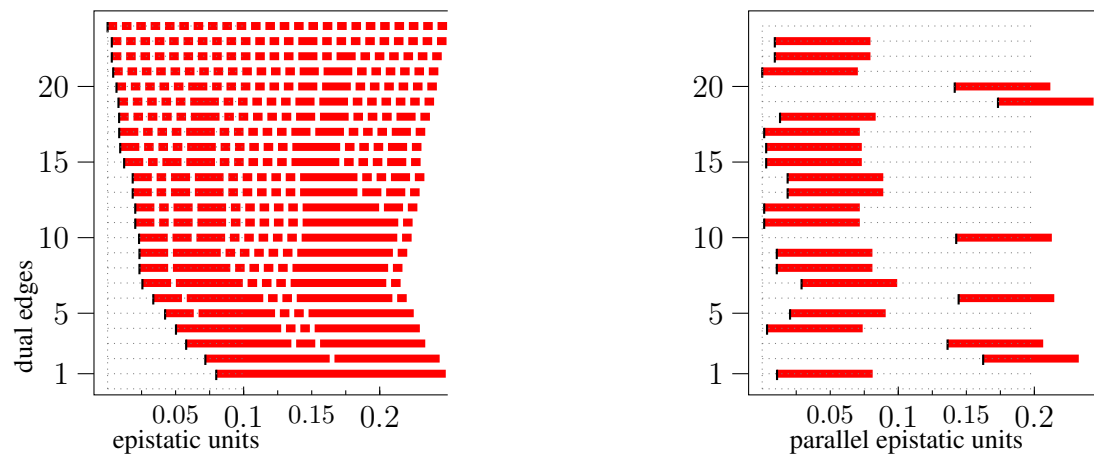

Figure S6: Parallel transport from the face \*\*0\*\* to the face \*\*1\*\* within the Tan data. Analysis based on mean values only; hence there is no color coding for the significance.

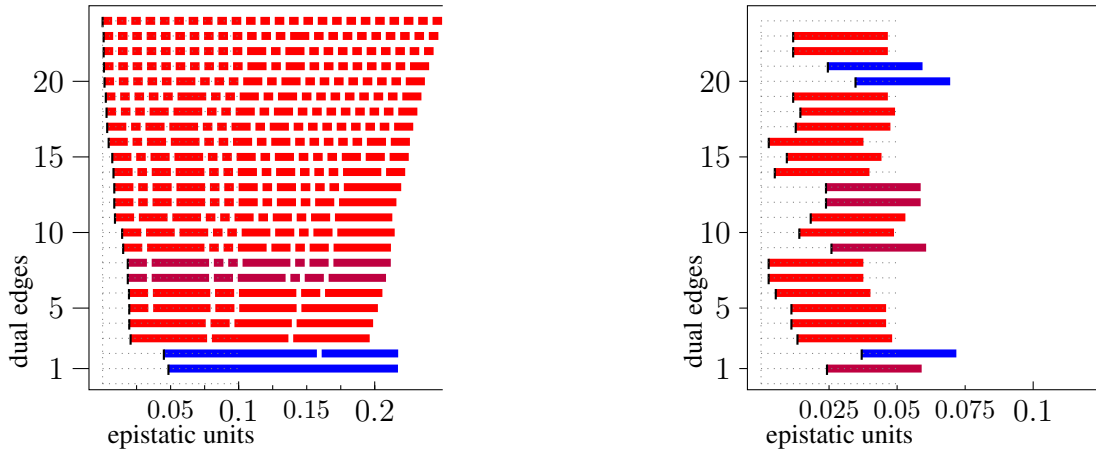

Figure S7: 0\*\*\*\*(Eble) to 1\*\*\*\*(Eble).

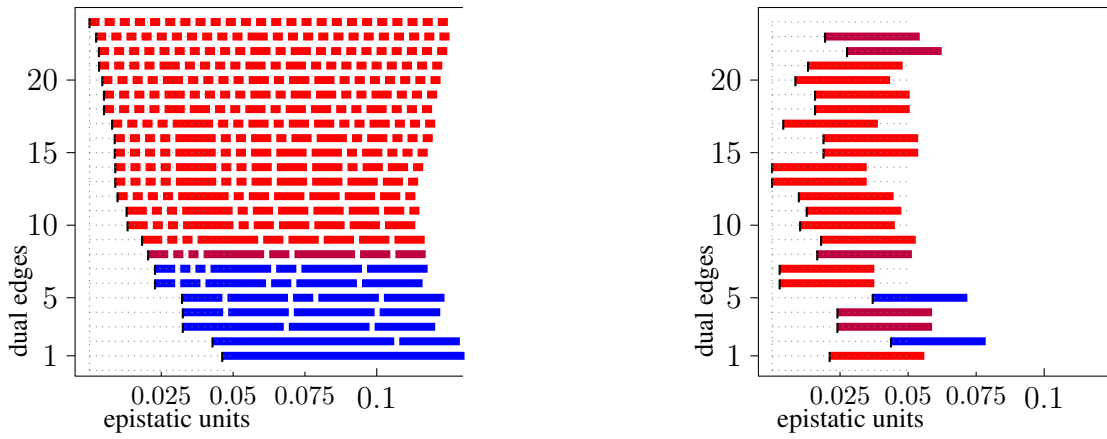

Figure S8: \*0\*\*\*\*(Eble) to \*1\*\*\*\*(Eble).

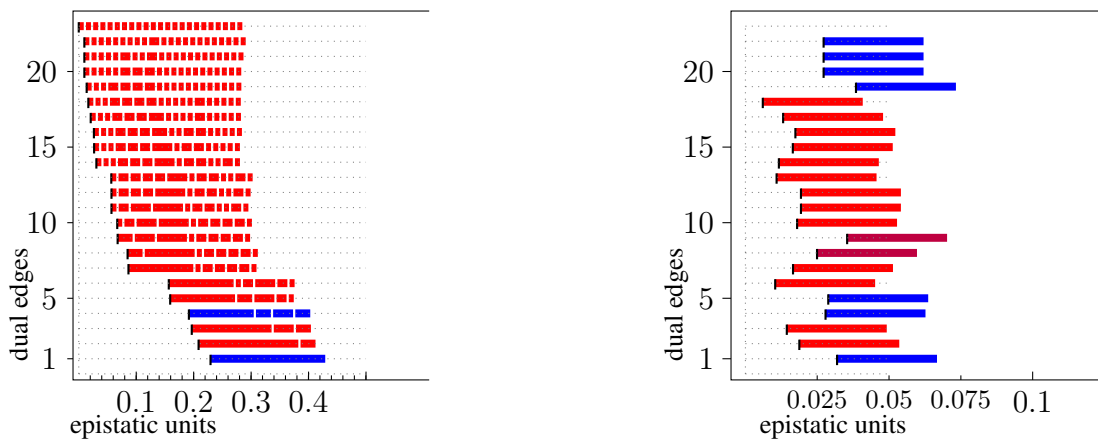

Figure S9: 0\*\*\*\*(GouldCFU) to 0\*\*\*\*(GouldTTD).

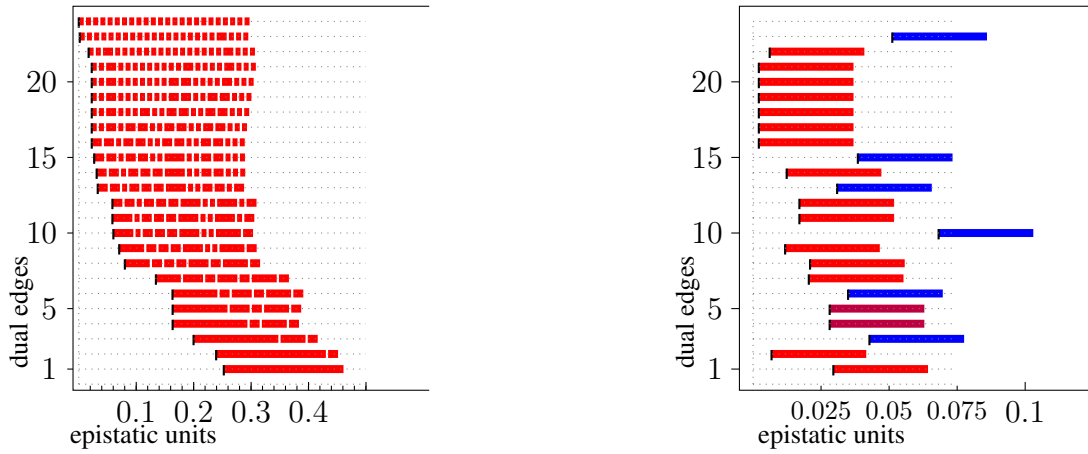

Figure S10: 1\*\*\*(GouldCFU) to 1\*\*\*(GouldTTD).

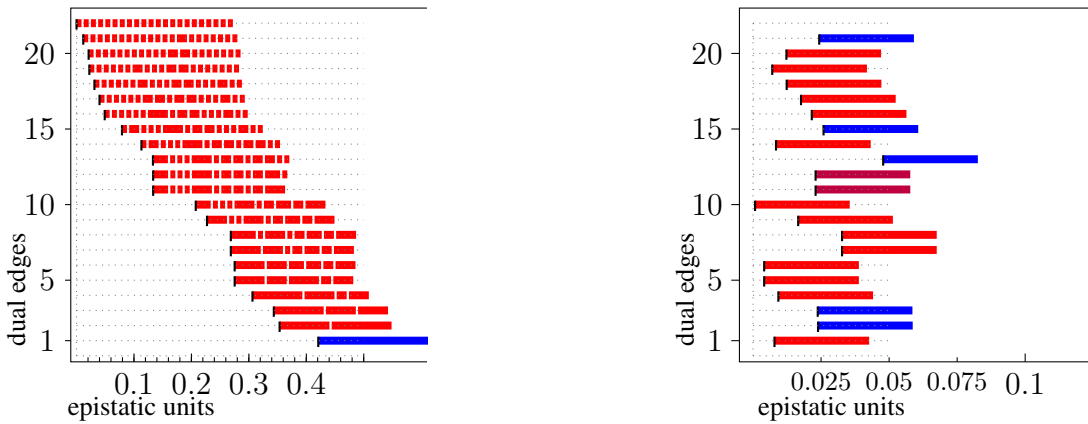

Figure S11: \*0\*\*\*(GouldCFU) to \*0\*\*\*(GouldTTD).

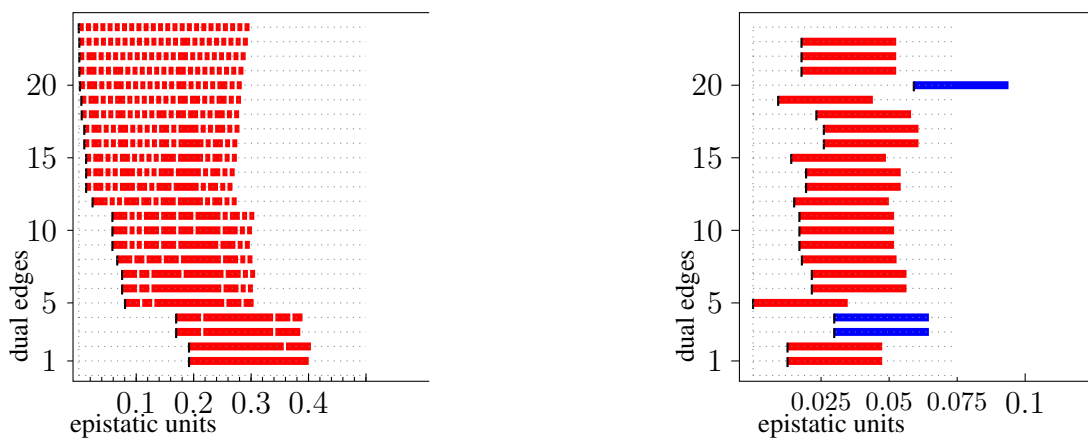

Figure S12: \*1\*\*\*(GouldCFU) to \*1\*\*\*(GouldTTD).

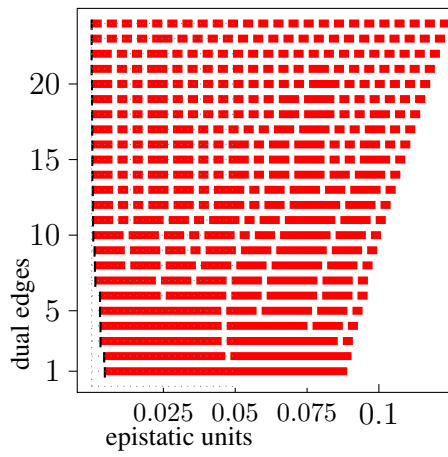

Figure S13: Product model associated to the parallel transport  $0^{**}0^{*} \rightarrow 1^{**}0^{*}$  within the Khan evolution data, cf. (Fig. S1.)

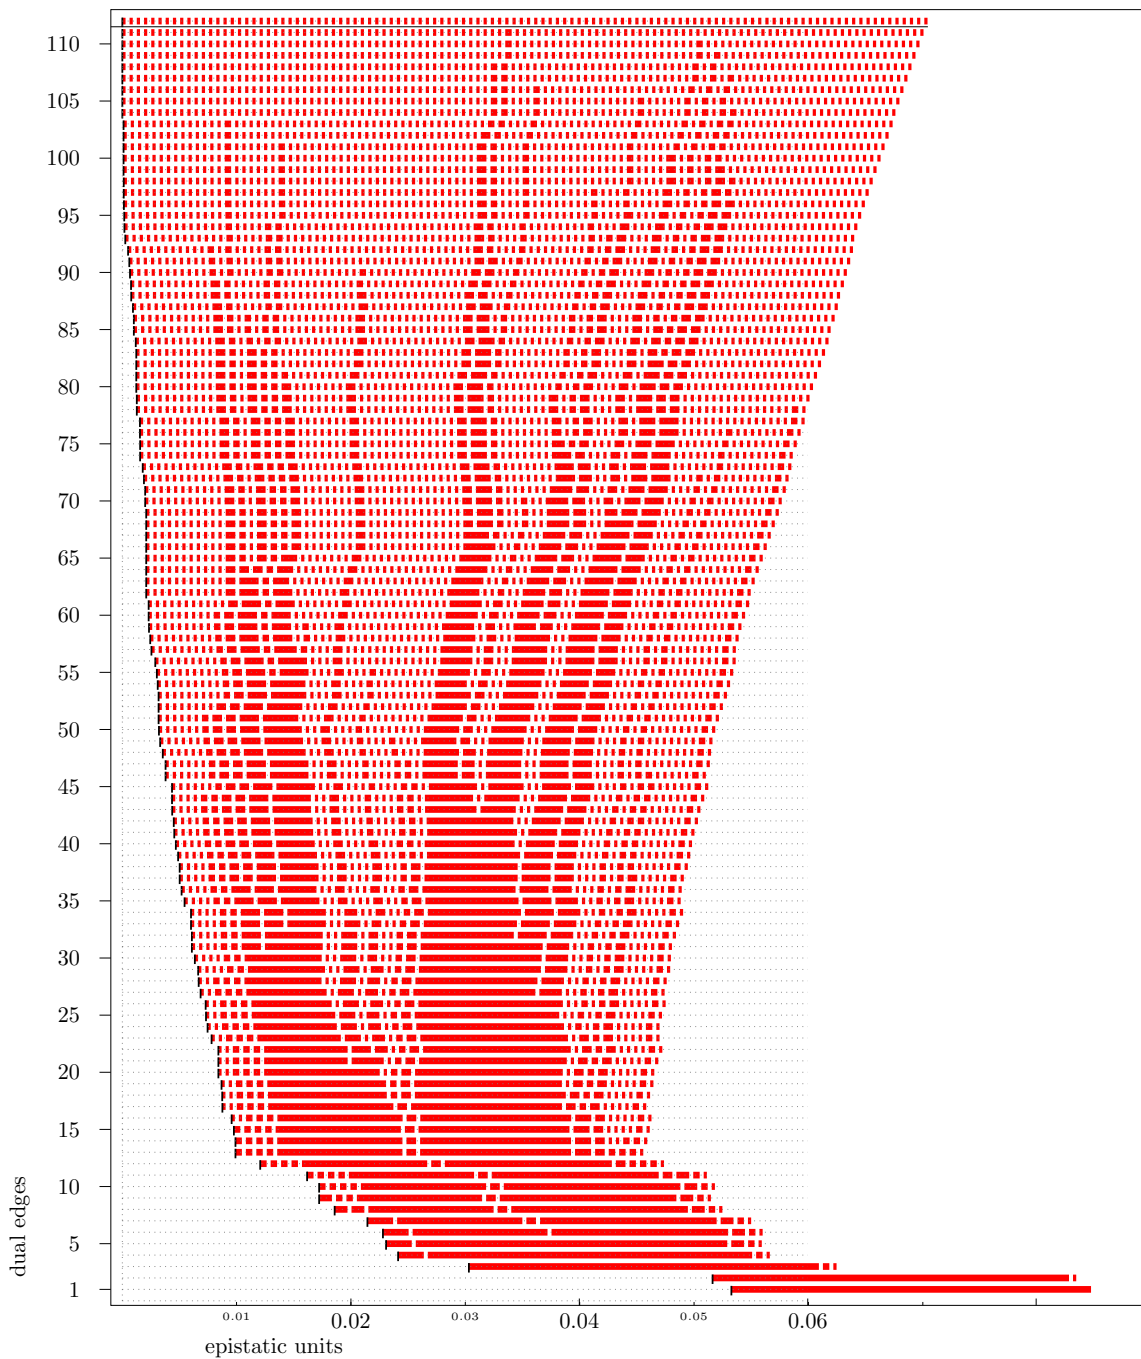

Figure S14: Non-generic product model associated to the parallel transport  $**0** \rightarrow **1**$  within the Tan data. Its unique non-simplicial maximal cell has 7 vertices and is split into a bipyramid by a slight perturbation of its height values, cf. Theorem 8 of (38). The corresponding artificial dual edge has edge label 111 and is indicated by a horizontal line.

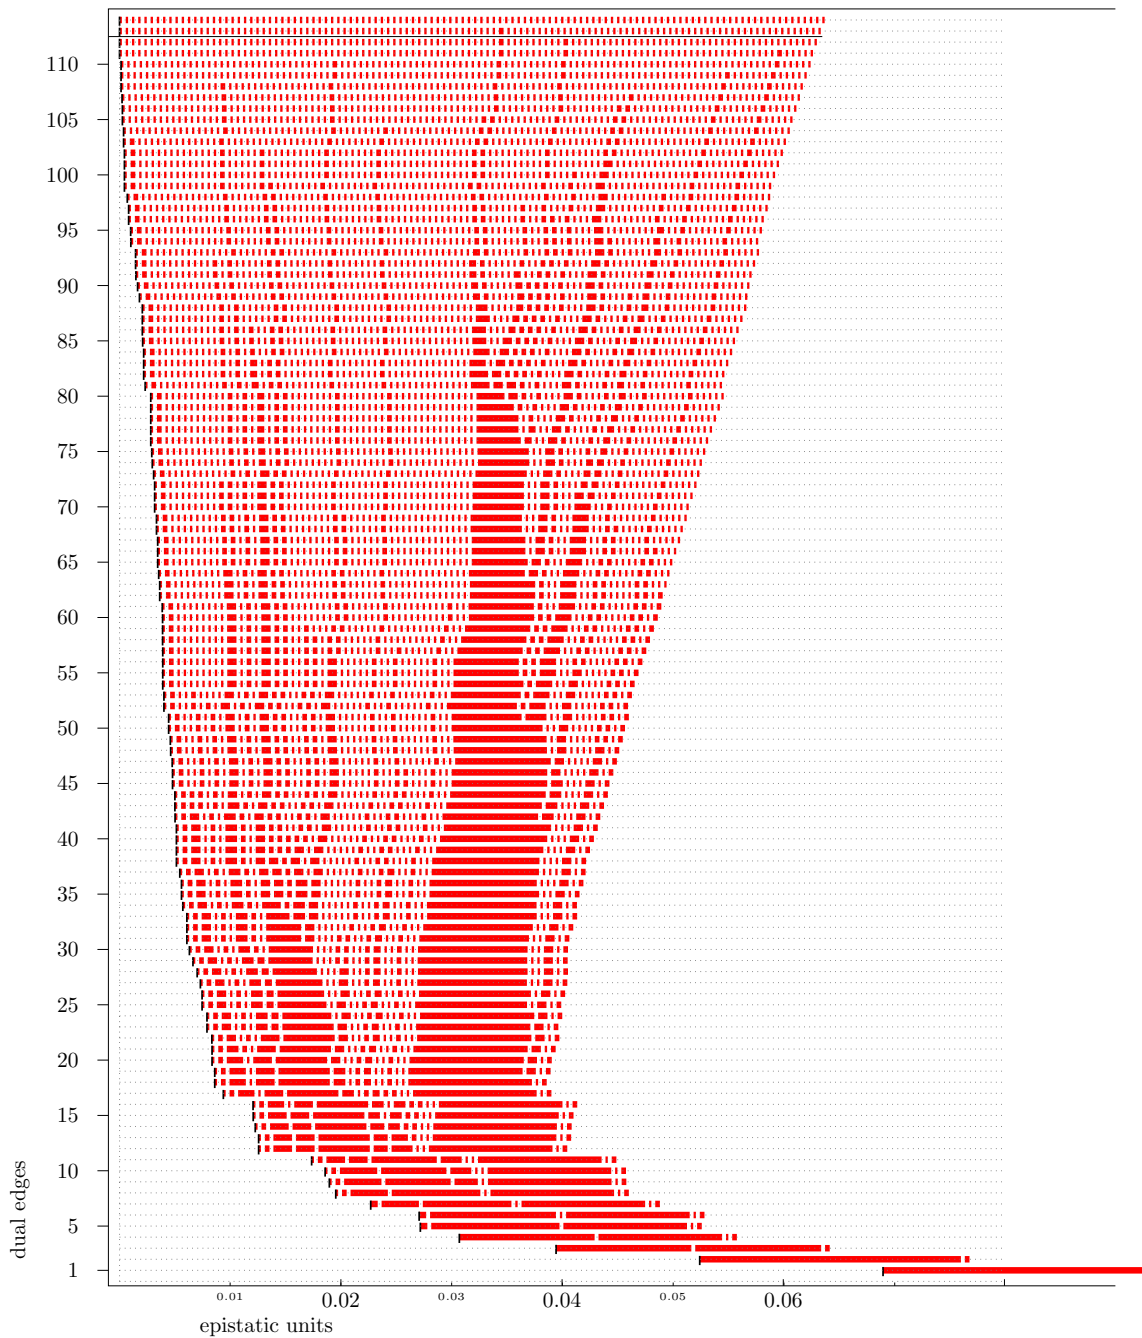

Figure S15: Non-generic product model associated to the parallel transport  $0^{****} \rightarrow 1^{****}$  within the Tan data. There are two non-simplicial maximal cells, both of cardinality 7. As in (Fig. S14) they are split into a bipyramid each at the beginning of the filtration process.

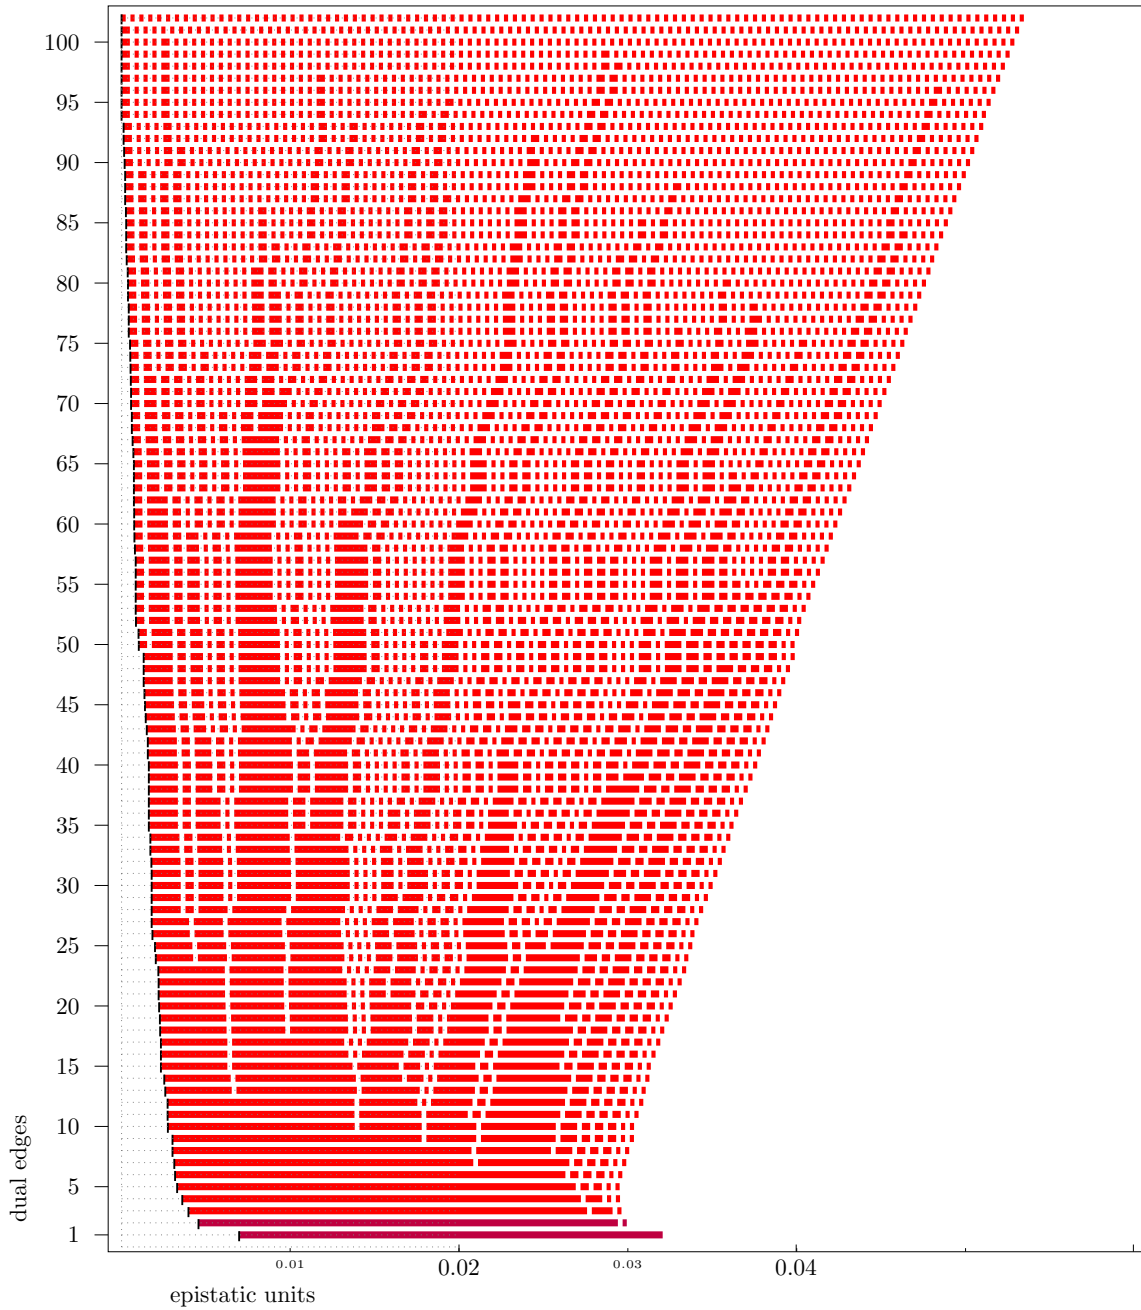

Figure S16: Product model for the parallel transport Khan  $***0* \rightarrow ***1*$ . The semisignificant bipyramid labeled 2 reads  $\{(1000)_o\} + \{(0000)_o, (1010)_o, (0110)_o, (1010)_p, (0011)_p\} + \{(0010)_o\}$  and the semisignificant bipyramid labeled 1 reads  $\{(1100)_o\} + \{(1011)_o, (1010)_p, (1001)_p, (0011)_p, (1111)_p\} + \{(1011)_p\}$ .

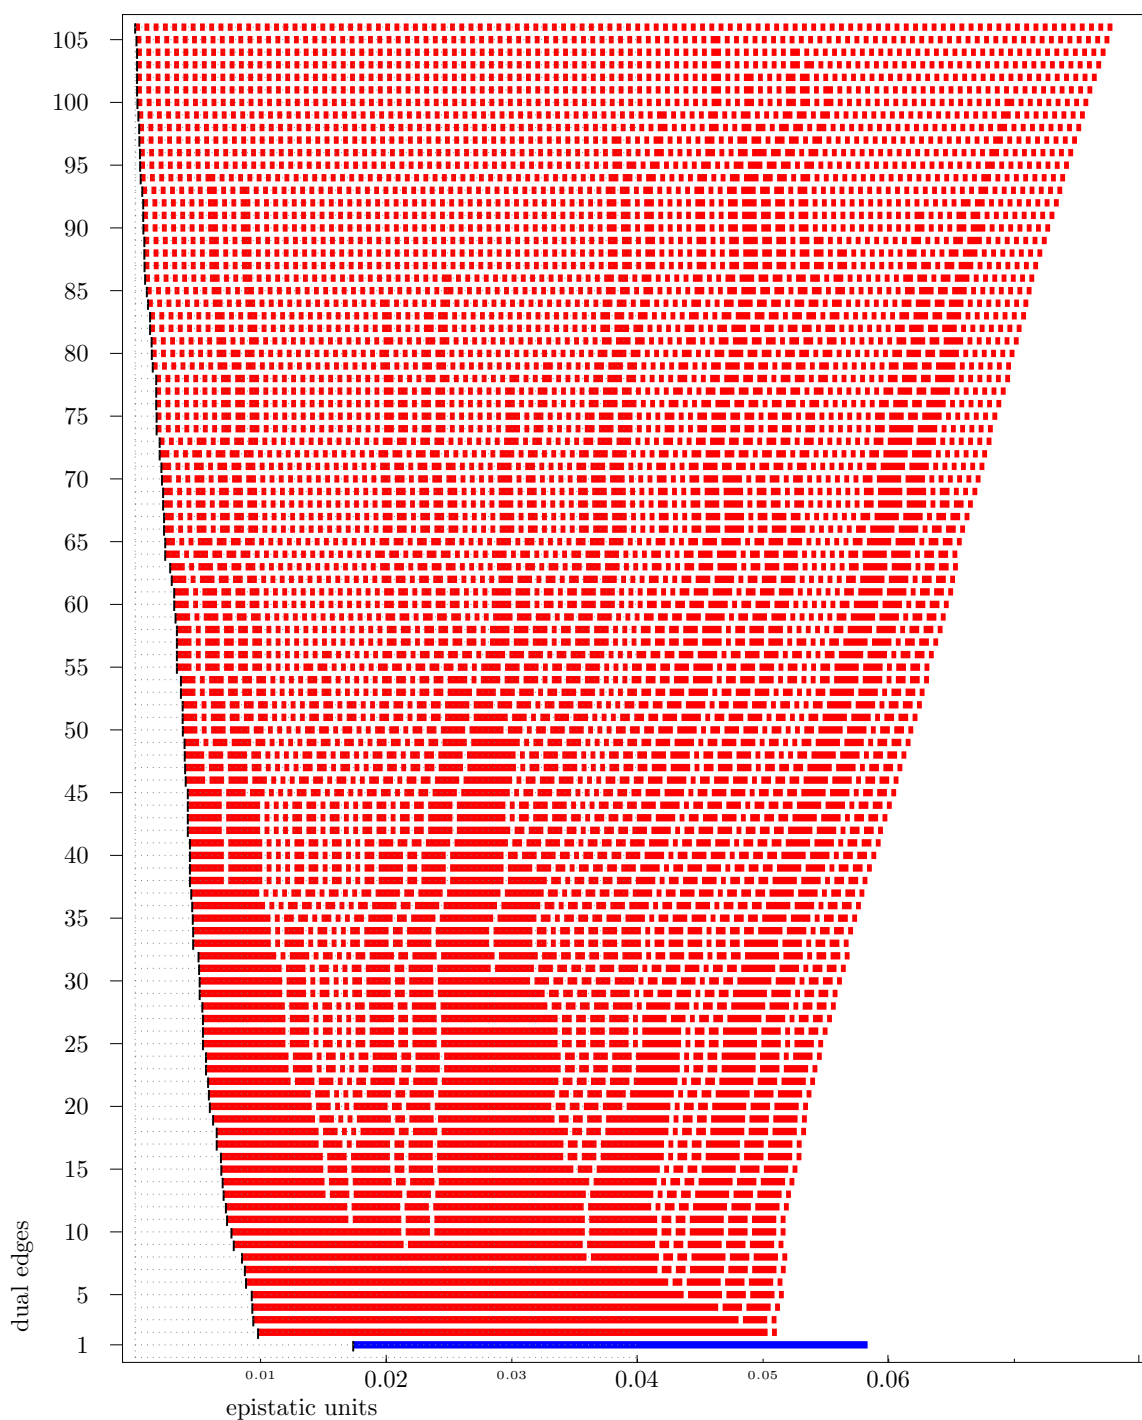

Figure S17: Product model for the parallel transport Eble  $0**** \rightarrow 1****$ . The unique significant bipyramid reads  $\{(0001)_o\} + \{(0000)_o, (1001)_o, (0101)_o, (0011)_o, (0001)_p\} + \{(0101)_p\}$ .



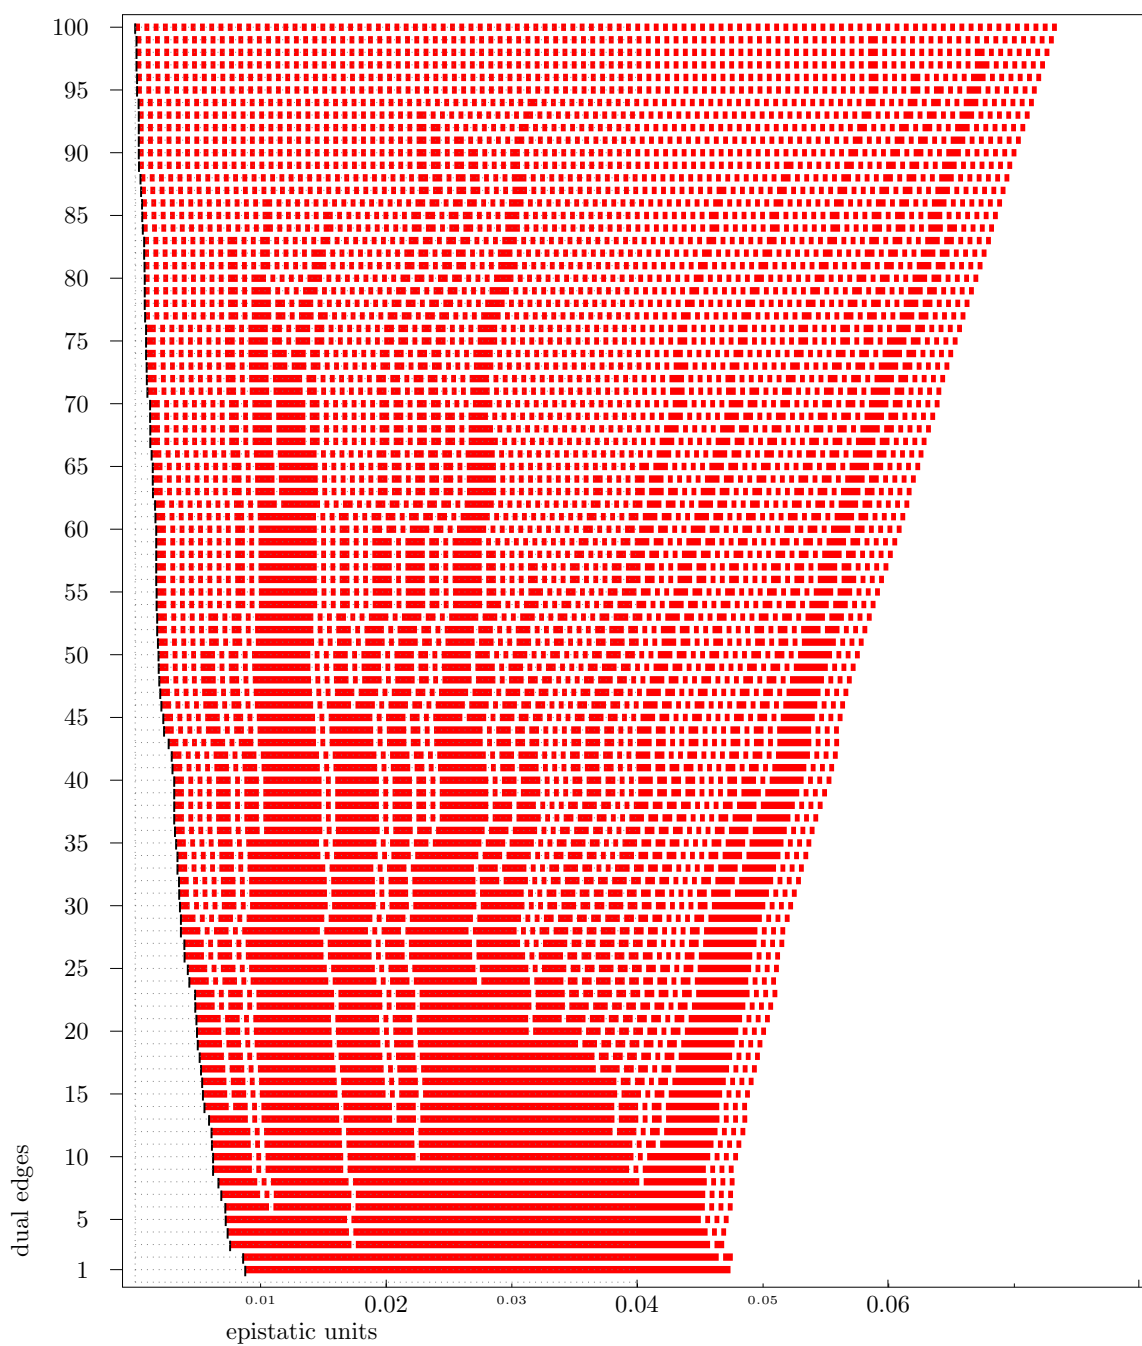

Figure S18: Product model for the parallel transport Eble  $*0*** \rightarrow *1***$ .

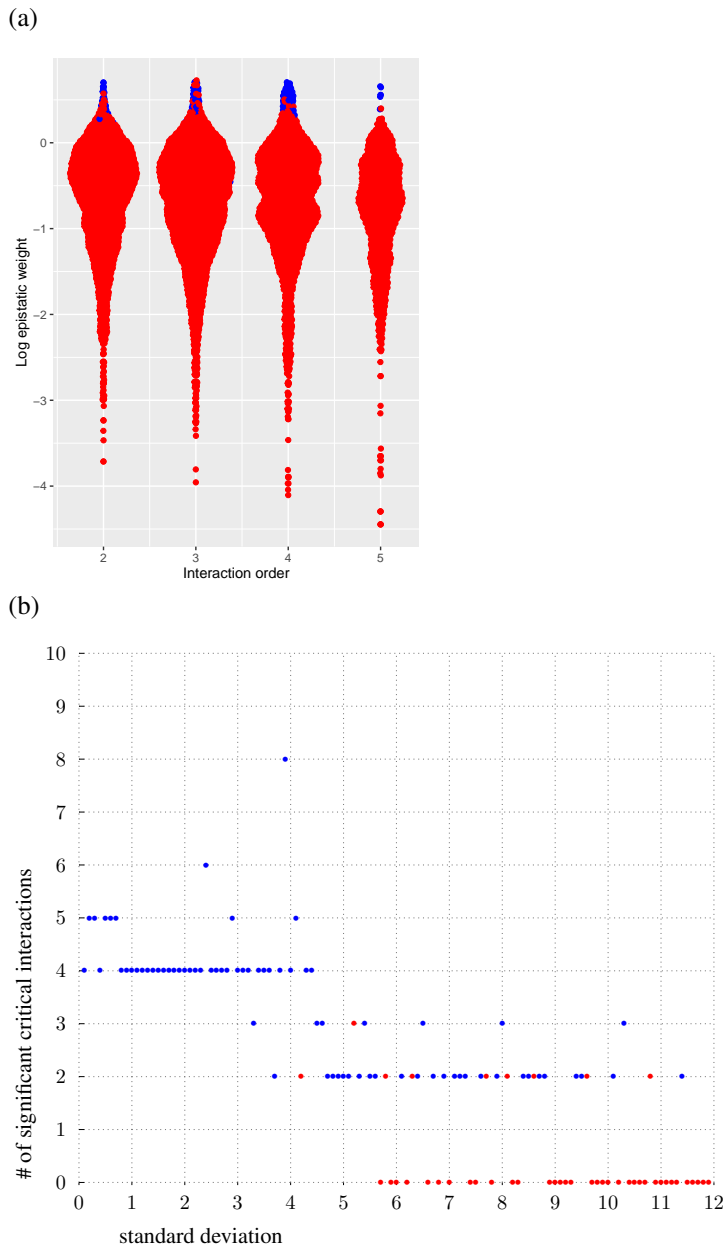

Figure S19: **Synthetic data demonstrate method performance.** Synthetic height functions over the 4-dimensional cube are generated with 100 replicates each and standard deviation as indicated. The heights of the wild type 0000 and 0001 are sampled with mean 53, all the other vertices with mean 50. (a) The distribution of  $\log_{10}$ -transformed epistatic weights is roughly constant as a function of interaction order, indicating the dimensional normalization is effective. (b) The number of significant interactions decreases as the standard deviation of the input data for each genotype increases. A blue dot is drawn if the interaction is significant and a red dot is drawn otherwise.

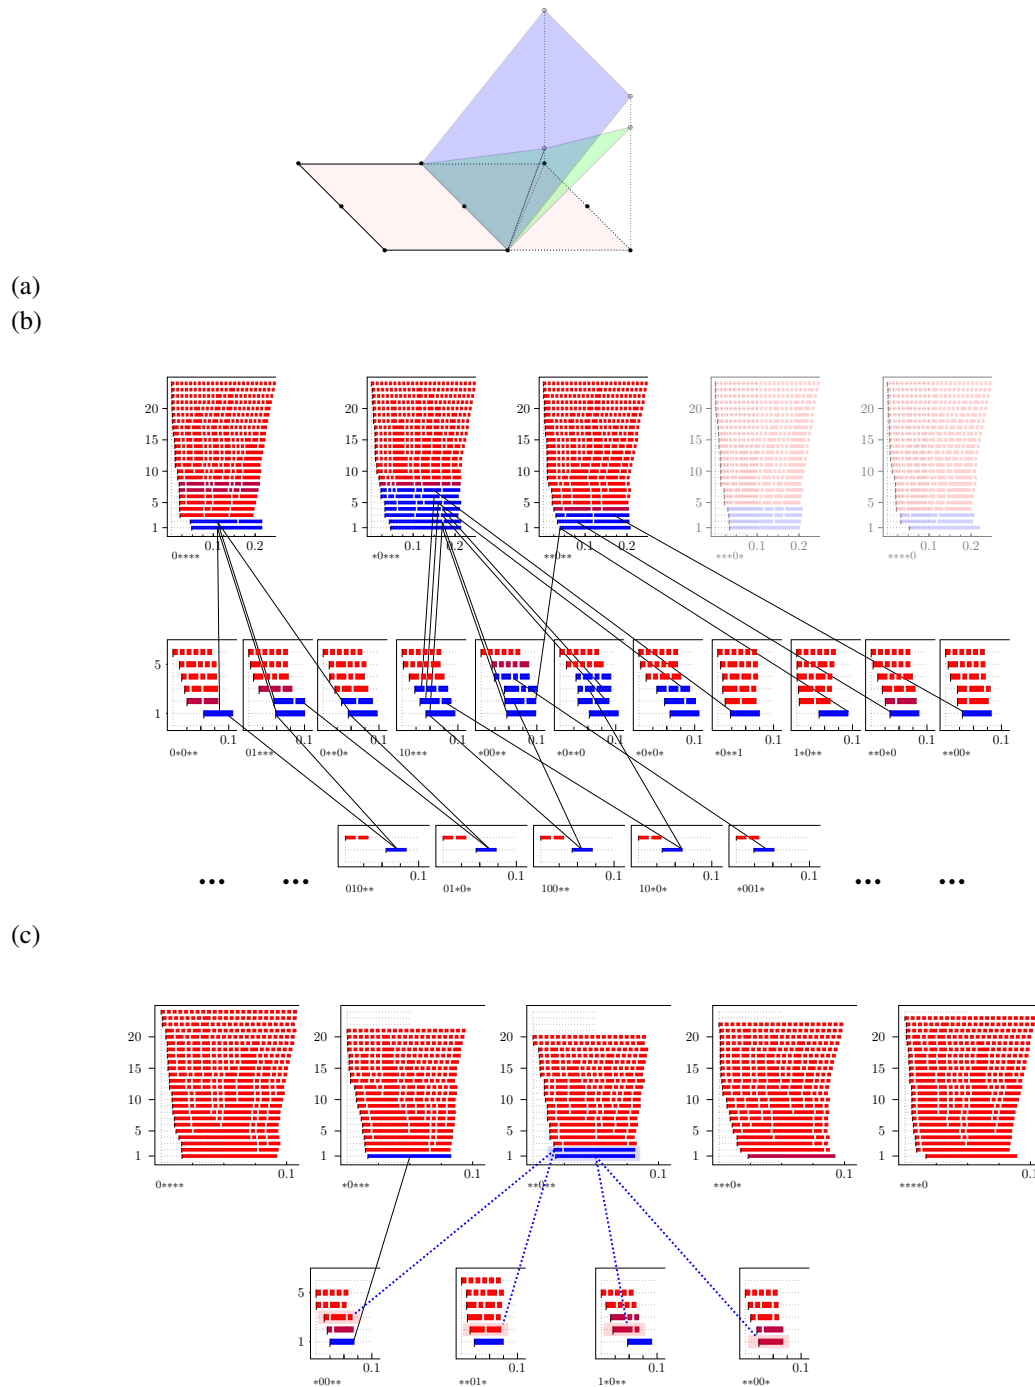

Figure S20: **Meta-epistatic charts illustrate whether or not higher-order interactions arise from lower-order interactions.** (a) Cartoon of the principle underlying meta-epistatic charts. The important loci in the interaction are depicted as black dots in a hyperplane through the genotypes, where the true dimensions of the genotypes are flattened onto the cartoon plane (pink). Higher-order interactions that derive from lower-order interactions occur in a new hyperplane (blue), which magnifies the weights of a subset of the landscape. In contrast, novel higher-order interactions that only arise in higher dimensions do not lie in a single additional hyperplane but instead require at least two additional hyperplanes (green). In (b) and (c) two meta-epistatic charts are represented. In each chart we identify the source of a higher-order interaction for the Eble and Gould data respectively. The results are compiled in Table S6.

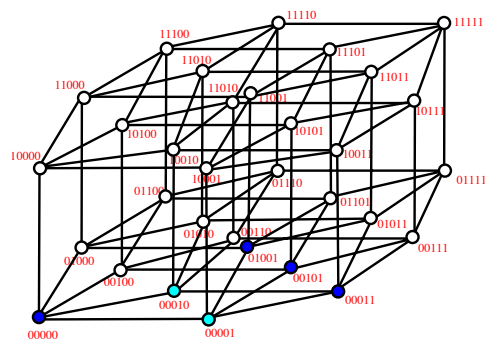

Figure S21: **Vertices of the bipyramid  $\{00001\} + \{00000, 01001, 00101, 00011\} + \{00010\}$  arising for the Khan data set (37) restricted to  $n = 4$  loci.** Dark blue dots correspond to common face  $s \cap t$  of the bipyramid and light blue dots correspond to the satellite vertices of  $s$  and  $t$ .

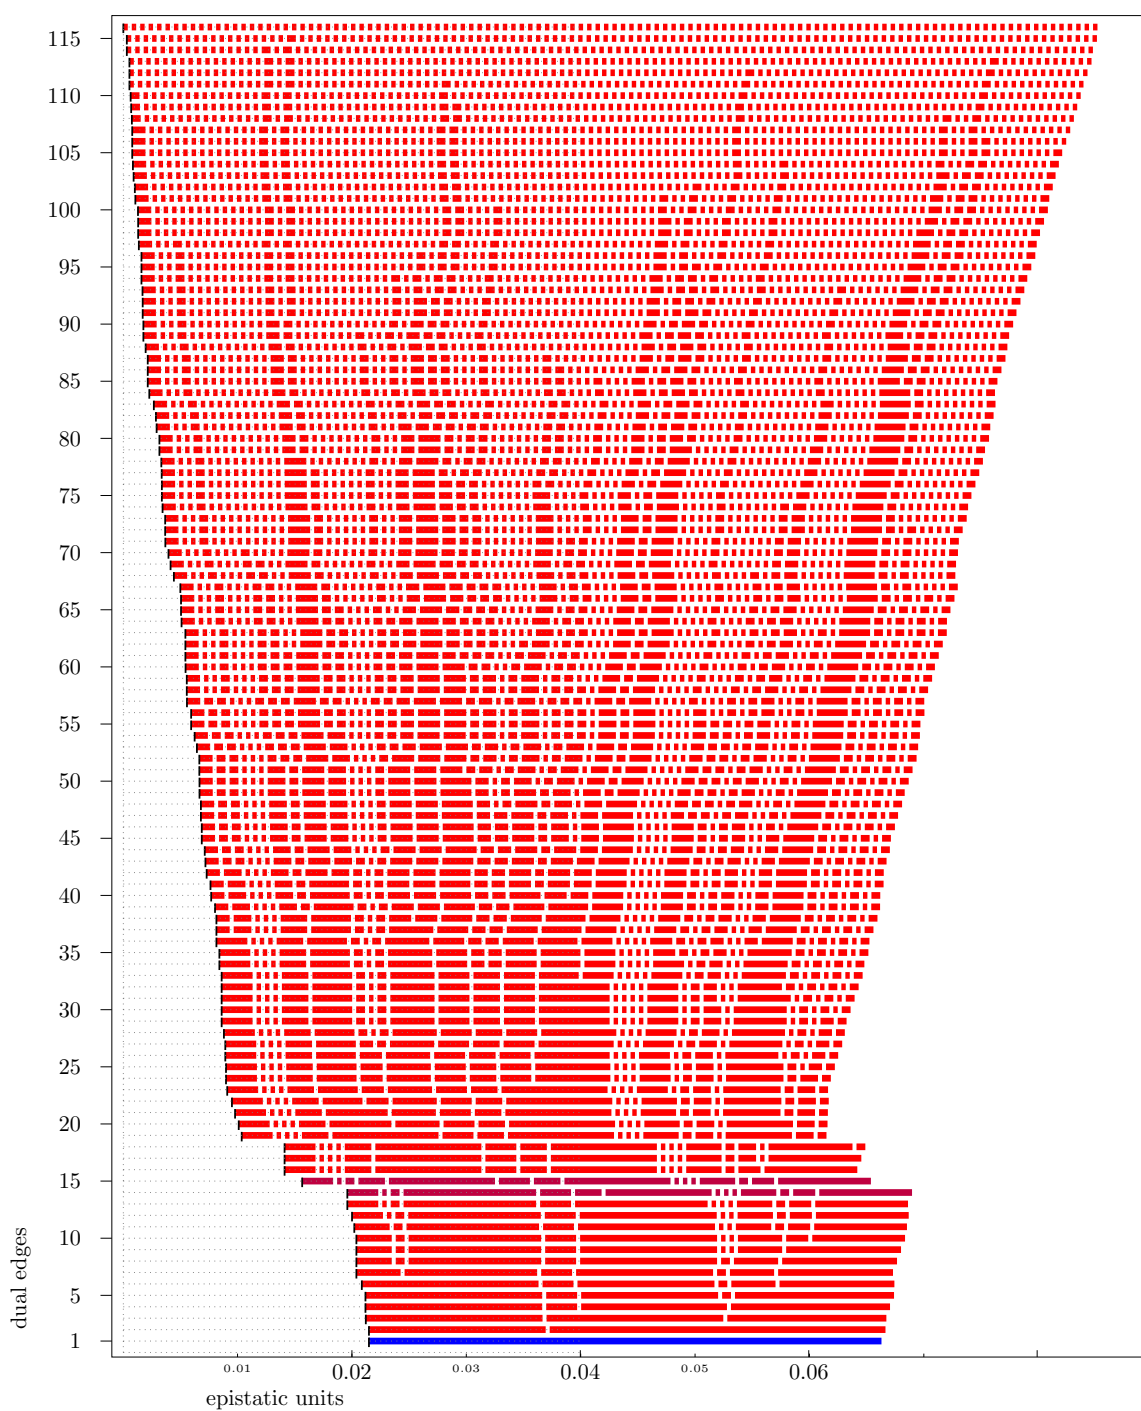

Figure S22: Complete filtration of the Eble fitness landscape over the whole 5-cube.

Table S1: Number of circuits of  $[0, 1]^n$  and bipyramids among these.

| dimensions | circuits | bipyramids | percentage |
|------------|----------|------------|------------|
| 2          | 1        | 1          | 100.00%    |
| 3          | 20       | 8          | 40.00%     |
| 4          | 1348     | 1088       | 80.71%     |
| 5          | 353616   | 309056     | 87.40%     |

Table S2: Parallel analysis GouldCFU 0\*\*\*\* → Gould 0\*\*\*\*, non-critical red/red-case omitted.

| No. | bipyramid                                 | type      | $e_o$ | $e_p$ | $e_o/e_p$ | $p_o$ | $p_p$ | $p_o/p_p$ |
|-----|-------------------------------------------|-----------|-------|-------|-----------|-------|-------|-----------|
| 22  | {01001}+{01000,01100,01010,00111}+{00110} | red/blue  | 0.010 | 0.027 | 0.357     | 0.978 | 0.038 | 25.873    |
| 21  | {01001}+{01000,00100,01100,00111}+{00110} | red/blue  | 0.010 | 0.027 | 0.357     | 0.978 | 0.038 | 25.873    |
| 20  | {01001}+{01000,00010,01010,00111}+{00110} | red/blue  | 0.010 | 0.027 | 0.357     | 0.978 | 0.038 | 25.873    |
| 19  | {01001}+{01000,00100,00010,00111}+{00110} | red/blue  | 0.014 | 0.039 | 0.357     | 0.978 | 0.038 | 25.873    |
| 18  | {01100}+{01001,01110,01101,00111}+{01111} | red/red   | 0.017 | 0.006 | 2.747     | 0.815 | 0.677 | 1.204     |
| 17  | {01000}+{01100,01010,00110,00111}+{01110} | red/red   | 0.021 | 0.013 | 1.584     | 0.783 | 0.433 | 1.808     |
| 16  | {00100}+{01100,01001,00101,00111}+{01101} | red/red   | 0.026 | 0.017 | 1.514     | 0.807 | 0.302 | 2.672     |
| 15  | {01001}+{01100,01010,01110,00111}+{00110} | red/red   | 0.027 | 0.017 | 1.619     | 0.941 | 0.231 | 4.074     |
| 14  | {00001}+{00010,01001,00011,00111}+{01011} | red/red   | 0.031 | 0.012 | 2.630     | 0.905 | 0.312 | 2.901     |
| 13  | {01000}+{00100,00010,00001,01001}+{00111} | red/red   | 0.057 | 0.011 | 5.217     | 0.869 | 0.479 | 1.814     |
| 12  | {00010}+{01000,01010,00110,00111}+{01100} | red/red   | 0.057 | 0.019 | 2.943     | 0.531 | 0.148 | 3.588     |
| 11  | {00010}+{01000,00100,00110,00111}+{01100} | red/red   | 0.057 | 0.019 | 2.943     | 0.531 | 0.148 | 3.588     |
|     | {00010}+{01000,01010,01001,00111}+{01100} | red/blue  | 0.067 | 0.047 | 1.431     | 0.853 | 0.032 | 27.079    |
|     | {00010}+{01000,00100,01001,00111}+{01100} | red/blue  | 0.067 | 0.047 | 1.431     | 0.853 | 0.032 | 27.079    |
| 10  | {01010}+{01001,01110,01011,00111}+{01111} | red/red   | 0.067 | 0.018 | 3.722     | 0.323 | 0.186 | 1.737     |
| 9   | {00000}+{01000,00100,00010,00001}+{01001} | red/red   | 0.068 | 0.035 | 1.911     | 0.851 | 0.086 | 9.872     |
| 8   | {00100}+{01000,01100,00110,00111}+{01010} | red/red   | 0.085 | 0.025 | 3.408     | 0.317 | 0.083 | 3.819     |
| 7   | {01000}+{00100,00010,01001,00111}+{00001} | red/red   | 0.087 | 0.017 | 5.217     | 0.869 | 0.479 | 1.814     |
|     | {00100}+{01000,01100,01001,00111}+{01010} | red/blue  | 0.095 | 0.052 | 1.816     | 0.791 | 0.019 | 40.984    |
|     | {00100}+{01000,00010,01001,00111}+{01010} | red/blue  | 0.095 | 0.052 | 1.816     | 0.791 | 0.019 | 40.984    |
| 6   | {01101}+{01001,01110,00111,01111}+{01011} | red/red   | 0.157 | 0.010 | 15.097    | 0.533 | 0.362 | 1.472     |
| 5   | {00001}+{00100,01001,00101,00111}+{01100} | red/blue  | 0.159 | 0.029 | 5.516     | 0.541 | 0.028 | 19.049    |
| 4   | {01010}+{00010,01001,01011,00111}+{00011} | blue/blue | 0.192 | 0.028 | 6.871     | 0.032 | 0.042 | 0.758     |
| 3   | {00010}+{00100,00001,01001,00111}+{00101} | red/red   | 0.197 | 0.014 | 13.654    | 0.262 | 0.211 | 1.242     |
| 2   | {01100}+{01010,01001,01110,00111}+{01011} | red/red   | 0.209 | 0.019 | 11.109    | 0.502 | 0.175 | 2.869     |
| 1   | {01000}+{00010,01010,01001,00111}+{01011} | blue/blue | 0.229 | 0.032 | 7.188     | 0.458 | 0.049 | 9.271     |
|     | {00100}+{00010,00001,01001,00111}+{00011} | blue/red  | 0.365 | 0.007 | 53.243    | 0.026 | 0.526 | 0.049     |

Table S3: Parallel analysis GouldCFU 1\*\*\*\* → Gould 1\*\*\*\*, non-critical red/red-case omitted.

| No. | bipyramid                                 | type     | $e_o$ | $e_p$ | $e_o/e_p$ | $p_o$ | $p_p$ | $p_o/p_p$ |
|-----|-------------------------------------------|----------|-------|-------|-----------|-------|-------|-----------|
| 23  | {11001}+{11000,10101,11101,11011}+{11111} | red/blue | 0.002 | 0.051 | 0.033     | 0.962 | 0.001 | 1286.096  |
| 22  | {11100}+{11000,10101,11110,11101}+{11111} | red/red  | 0.017 | 0.006 | 2.799     | 0.773 | 0.689 | 1.122     |
| 21  | {10000}+{11010,10101,10011,10111}+{11111} | red/red  | 0.023 | 0.002 | 10.615    | 0.967 | 0.875 | 1.105     |
| 20  | {10000}+{11010,10101,10011,11011}+{11111} | red/red  | 0.023 | 0.002 | 10.615    | 0.967 | 0.875 | 1.105     |
| 19  | {10000}+{11000,11010,10101,11011}+{11111} | red/red  | 0.023 | 0.002 | 10.615    | 0.967 | 0.875 | 1.105     |
| 18  | {10000}+{11010,10110,10101,10111}+{11111} | red/red  | 0.023 | 0.002 | 10.615    | 0.967 | 0.875 | 1.105     |
| 17  | {10000}+{11010,10110,10101,11110}+{11111} | red/red  | 0.023 | 0.002 | 10.615    | 0.967 | 0.875 | 1.105     |
| 16  | {10000}+{11000,11010,10101,11110}+{11111} | red/red  | 0.023 | 0.002 | 10.615    | 0.967 | 0.875 | 1.105     |
| 15  | {11011}+{11010,10101,10011,11111}+{11011} | red/blue | 0.027 | 0.039 | 0.695     | 0.580 | 0.012 | 47.154    |
| 14  | {10110}+{10000,10010,11010,10111}+{10011} | red/red  | 0.031 | 0.012 | 2.513     | 0.693 | 0.277 | 2.502     |
| 13  | {11001}+{10000,10001,10101,11011}+{10011} | red/blue | 0.033 | 0.031 | 1.066     | 0.388 | 0.007 | 54.190    |
| 12  | {11010}+{11000,10101,11011,11111}+{11101} | red/red  | 0.059 | 0.017 | 3.428     | 0.905 | 0.318 | 2.846     |
| 11  | {11010}+{11000,10101,11110,11111}+{11101} | red/red  | 0.059 | 0.017 | 3.428     | 0.905 | 0.318 | 2.846     |
| 10  | {11010}+{10000,11000,10101,11011}+{11001} | red/blue | 0.060 | 0.068 | 0.881     | 0.902 | 0.000 | $\infty$  |
| 9   | {10000}+{11000,11100,10101,11110}+{11101} | red/red  | 0.070 | 0.012 | 5.959     | 0.897 | 0.426 | 2.106     |
| 8   | {10100}+{10000,11100,10110,10101}+{11110} | red/red  | 0.080 | 0.021 | 3.820     | 0.430 | 0.274 | 1.569     |
| 7   | {11110}+{11010,10110,10101,11111}+{10111} | red/red  | 0.134 | 0.021 | 6.534     | 0.130 | 0.227 | 0.573     |
| 6   | {11000}+{10000,11010,10101,11110}+{10110} | red/blue | 0.163 | 0.035 | 4.659     | 0.737 | 0.019 | 38.586    |
| 5   | {10010}+{10000,11010,10110,10111}+{10101} | red/red  | 0.163 | 0.028 | 5.788     | 0.776 | 0.075 | 10.402    |
| 4   | {10010}+{10000,11010,10011,10111}+{10101} | red/red  | 0.163 | 0.028 | 5.788     | 0.776 | 0.075 | 10.402    |
|     | {11000}+{11010,10101,11110,11111}+{10110} | red/blue | 0.186 | 0.037 | 5.000     | 0.695 | 0.026 | 26.834    |
| 3   | {11000}+{10000,11100,10101,11110}+{10110} | red/blue | 0.200 | 0.043 | 4.659     | 0.737 | 0.019 | 38.586    |
| 2   | {11000}+{10000,11010,10101,11011}+{10011} | red/red  | 0.239 | 0.007 | 35.102    | 0.621 | 0.628 | 0.989     |
| 1   | {11000}+{10000,11001,10101,11011}+{10001} | red/red  | 0.253 | 0.030 | 8.530     | 0.671 | 0.104 | 6.452     |
|     | {11110}+{11000,11010,10101,11111}+{11011} | red/blue | 0.301 | 0.026 | 11.785    | 0.288 | 0.035 | 8.348     |
|     | {10001}+{10000,10101,10011,11011}+{11010} | red/blue | 0.313 | 0.039 | 8.062     | 0.598 | 0.014 | 43.650    |



Table S4: Parallel analysis GouldCFU \*0\*\*\* → Gould \*0\*\*\*, non-critical red/red-case omitted.

| No. | bipyramid                                 | type     | $e_o$ | $e_p$ | $e_o/e_p$ | $p_o$ | $p_p$ | $p_o/p_p$ |
|-----|-------------------------------------------|----------|-------|-------|-----------|-------|-------|-----------|
| 21  | {10001}+{10000,00001,10101,10011}+{00111} | red/blue | 0.012 | 0.024 | 0.481     | 0.963 | 0.026 | 36.756    |
| 20  | {00010}+{10000,10010,00011,00111}+{10011} | red/red  | 0.021 | 0.012 | 1.714     | 0.797 | 0.270 | 2.952     |
| 19  | {10100}+{10000,00100,10110,10101}+{00110} | red/red  | 0.022 | 0.007 | 3.155     | 0.869 | 0.717 | 1.212     |
| 18  | {10110}+{10000,10010,00111,10111}+{10011} | red/red  | 0.031 | 0.012 | 2.513     | 0.693 | 0.277 | 2.502     |
| 17  | {00100}+{10000,00110,10101,00111}+{10110} | red/red  | 0.040 | 0.018 | 2.266     | 0.915 | 0.290 | 3.155     |
| 16  | {00100}+{10000,00110,10110,10101}+{00111} | red/red  | 0.049 | 0.022 | 2.266     | 0.915 | 0.290 | 3.155     |
| 15  | {00001}+{10000,00100,00010,00111}+{00110} | red/blue | 0.079 | 0.026 | 3.047     | 0.698 | 0.023 | 30.749    |
| 14  | {00010}+{10000,10010,00110,00111}+{10110} | red/red  | 0.113 | 0.008 | 13.352    | 0.295 | 0.461 | 0.640     |
| 13  | {00000}+{10000,00100,00010,00001}+{00111} | red/blue | 0.133 | 0.048 | 2.775     | 0.476 | 0.001 | 707.281   |
| 12  | {10010}+{10000,10011,00111,10111}+{10101} | red/red  | 0.133 | 0.023 | 5.788     | 0.776 | 0.075 | 10.402    |
| 11  | {10010}+{10000,10110,00111,10111}+{10101} | red/red  | 0.133 | 0.023 | 5.788     | 0.776 | 0.075 | 10.402    |
| 10  | {00011}+{10000,00001,10011,00111}+{10101} | red/red  | 0.208 | 0.001 | 275.689   | 0.413 | 0.949 | 0.435     |
| 9   | {00010}+{10000,00100,00001,00111}+{00101} | red/red  | 0.227 | 0.017 | 13.654    | 0.262 | 0.211 | 1.242     |
| 8   | {00100}+{10000,00001,00101,00111}+{10101} | red/red  | 0.269 | 0.033 | 8.193     | 0.579 | 0.101 | 5.733     |
| 7   | {00001}+{10000,00100,00101,00111}+{10101} | red/red  | 0.269 | 0.033 | 8.193     | 0.579 | 0.101 | 5.733     |
| 6   | {00001}+{10000,00010,00011,00111}+{10010} | red/red  | 0.275 | 0.004 | 67.167    | 0.493 | 0.755 | 0.653     |
| 5   | {00001}+{10000,00011,10011,00111}+{10010} | red/red  | 0.275 | 0.004 | 67.167    | 0.493 | 0.755 | 0.653     |
| 4   | {00110}+{10000,00100,10101,00111}+{00101} | red/red  | 0.306 | 0.009 | 32.813    | 0.413 | 0.610 | 0.677     |
| 3   | {00110}+{10000,10010,10110,00111}+{10111} | red/blue | 0.344 | 0.024 | 14.403    | 0.186 | 0.035 | 5.345     |
| 2   | {00110}+{10000,00010,10010,00111}+{00011} | red/blue | 0.354 | 0.024 | 14.760    | 0.175 | 0.030 | 5.853     |
|     | {00001}+{10000,10101,10011,00111}+{10111} | red/blue | 0.408 | 0.028 | 14.815    | 0.108 | 0.013 | 8.308     |
| 1   | {00100}+{10000,00010,00001,00111}+{00011} | blue/red | 0.421 | 0.008 | 53.243    | 0.026 | 0.526 | 0.049     |
|     | {00110}+{10000,10110,10101,00111}+{10111} | red/blue | 0.486 | 0.034 | 14.403    | 0.186 | 0.035 | 5.345     |

Table S5: Parallel analysis GouldCFU \*1\*\*\* → Gould \*1\*\*\*, non-critical red/red-case omitted.

| No. | bipyramid                                 | type     | $e_o$ | $e_p$ | $e_o/e_p$ | $p_o$ | $p_p$ | $p_o/p_p$ |
|-----|-------------------------------------------|----------|-------|-------|-----------|-------|-------|-----------|
| 23  | {01100}+{11000,01110,01101,11110}+{11010} | red/red  | 0.001 | 0.018 | 0.054     | 0.998 | 0.292 | 3.418     |
| 22  | {01100}+{11000,01010,01001,01110}+{11010} | red/red  | 0.001 | 0.018 | 0.054     | 0.998 | 0.292 | 3.418     |
| 21  | {01100}+{11000,01001,01110,01101}+{11010} | red/red  | 0.001 | 0.018 | 0.054     | 0.998 | 0.292 | 3.418     |
| 20  | {11001}+{11000,01001,11101,11011}+{11111} | red/blue | 0.002 | 0.059 | 0.033     | 0.962 | 0.001 | 1286.096  |
| 19  | {11110}+{11010,01110,01101,11111}+{01111} | red/red  | 0.005 | 0.009 | 0.488     | 0.945 | 0.576 | 1.641     |
| 18  | {11100}+{11000,01100,11110,11101}+{01101} | red/red  | 0.005 | 0.023 | 0.218     | 0.952 | 0.193 | 4.933     |
| 17  | {11000}+{11010,01110,01101,11111}+{11111} | red/red  | 0.010 | 0.026 | 0.369     | 0.981 | 0.106 | 9.255     |
| 16  | {01110}+{11000,11010,01101,11110}+{11111} | red/red  | 0.010 | 0.026 | 0.369     | 0.981 | 0.106 | 9.255     |
| 15  | {01100}+{11000,01101,11110,11101}+{11111} | red/red  | 0.013 | 0.014 | 0.905     | 0.866 | 0.346 | 2.503     |
| 14  | {11000}+{01001,11010,01110,01101}+{01111} | red/red  | 0.013 | 0.020 | 0.656     | 0.974 | 0.160 | 6.087     |
| 13  | {11000}+{01001,11010,01101,11111}+{01111} | red/red  | 0.013 | 0.020 | 0.656     | 0.974 | 0.160 | 6.087     |
| 12  | {01000}+{11000,01100,01010,01001}+{01110} | red/red  | 0.024 | 0.015 | 1.584     | 0.783 | 0.433 | 1.808     |
| 11  | {11010}+{11000,01001,01101,11111}+{11101} | red/red  | 0.059 | 0.017 | 3.428     | 0.905 | 0.318 | 2.846     |
| 10  | {11010}+{11000,01001,11011,11111}+{11101} | red/red  | 0.059 | 0.017 | 3.428     | 0.905 | 0.318 | 2.846     |
| 9   | {11010}+{11000,01101,11110,11111}+{11101} | red/red  | 0.059 | 0.017 | 3.428     | 0.905 | 0.318 | 2.846     |
| 8   | {01010}+{01001,11010,01110,01011}+{01111} | red/red  | 0.067 | 0.018 | 3.722     | 0.323 | 0.186 | 1.737     |
| 7   | {01110}+{01001,11010,01101,01111}+{11111} | red/red  | 0.075 | 0.022 | 3.483     | 0.841 | 0.136 | 6.184     |
| 6   | {01001}+{11010,01110,01101,01111}+{11111} | red/red  | 0.075 | 0.022 | 3.483     | 0.841 | 0.136 | 6.184     |
| 5   | {11011}+{01001,11010,01011,11111}+{01111} | red/red  | 0.081 | 0.000 | 1235.241  | 0.126 | 0.996 | 0.127     |
| 4   | {11000}+{01010,01001,11010,01110}+{01011} | red/blue | 0.170 | 0.030 | 5.666     | 0.718 | 0.026 | 27.722    |
| 3   | {11000}+{01001,11010,11011,11111}+{01011} | red/blue | 0.170 | 0.030 | 5.666     | 0.718 | 0.026 | 27.722    |
| 2   | {01101}+{01001,11010,01110,01111}+{01011} | red/red  | 0.192 | 0.013 | 15.097    | 0.533 | 0.362 | 1.472     |
| 1   | {01101}+{01001,11010,01111,11111}+{01011} | red/red  | 0.192 | 0.013 | 15.097    | 0.533 | 0.362 | 1.472     |

Table S6: Significant 4-dimensional interactions, which cannot be seen in lower dimensions, cf. (Fig. S20). The value  $p \uparrow$  refers to the  $p$ -value of the 4-dimensional bipyramid in question whereas  $p \downarrow$  is the  $p$ -value of its ridge intersected with the  $\cap$ -face, cf. (Fig. S20c) for the Gould data.

| Data         | significant bipyramid                            | $\cap$ -face | $p \uparrow$ | $p \downarrow$ |
|--------------|--------------------------------------------------|--------------|--------------|----------------|
| Eble         | -                                                | -            | -            | -              |
| <b>Gould</b> |                                                  |              |              |                |
| **0**        | {00010} + {00000, 10010, 00011, 11011} + {10001} | **01*        | 0.041        | 0.270          |
|              |                                                  | *00**        | 0.041        | 0.149          |
|              | {10010} + {00000, 11000, 10001, 11011} + {01001} | 1*0**        | 0.041        | 0.076          |
|              |                                                  | **00*        | 0.041        | 0.063          |
| <b>Khan</b>  |                                                  |              |              |                |
| 0****        | {00010} + {00000, 01001, 00101, 00011} + {00001} | 0***1        | 0.009        | 0.052          |

Table S7: Bacterial species considered in the two microbiome data sets.

|           | Gould data set         | Eble data set        |
|-----------|------------------------|----------------------|
| Species 1 | <i>L. plantarum</i>    | <i>L. plantarum</i>  |
| Species 2 | <i>L. brevis</i>       | <i>L. brevis</i>     |
| Species 3 | <i>A. pasteurianus</i> | <i>A. cerevisiae</i> |
| Species 4 | <i>A. tropicalis</i>   | <i>A. malorum</i>    |
| Species 5 | <i>A. orientalis</i>   | <i>A. orientalis</i> |

Table S8: Parallel analysis Eble 0\*\*\*\*  $\rightarrow$  1\*\*\*\*, non-critical red/red-case omitted.

| No. | bipyramid <sub>s</sub>                    | type      | $e_o$ | $e_p$ | $e_o/e_p$ | $p_o$ | $p_p$ | $p_o/p_p$ |
|-----|-------------------------------------------|-----------|-------|-------|-----------|-------|-------|-----------|
| 23  | {00001}+{00000,01001,01011,00111}+{01111} | red/red   | 0.001 | 0.012 | 0.066     | 0.953 | 0.390 | 2.444     |
| 22  | {00001}+{00000,01001,01101,00111}+{01111} | red/red   | 0.001 | 0.012 | 0.066     | 0.953 | 0.390 | 2.444     |
| 21  | {01110}+{00000,00110,01011,01111}+{00111} | red/blue  | 0.001 | 0.025 | 0.041     | 0.923 | 0.038 | 24.226    |
| 20  | {01110}+{00000,01100,00110,01111}+{00111} | red/blue  | 0.001 | 0.035 | 0.041     | 0.923 | 0.038 | 24.226    |
| 19  | {00110}+{00000,01100,00111,01111}+{01101} | red/red   | 0.002 | 0.012 | 0.201     | 0.827 | 0.303 | 2.729     |
| 18  | {00110}+{00000,01100,00101,00111}+{01101} | red/red   | 0.003 | 0.014 | 0.201     | 0.827 | 0.303 | 2.729     |
| 17  | {01110}+{00000,01000,01100,01111}+{01101} | red/red   | 0.003 | 0.013 | 0.264     | 0.742 | 0.251 | 2.956     |
| 16  | {00110}+{00000,00010,01011,00111}+{00011} | red/red   | 0.004 | 0.003 | 1.568     | 0.755 | 0.843 | 0.896     |
| 15  | {00010}+{00000,01010,00110,01011}+{01110} | red/red   | 0.007 | 0.010 | 0.748     | 0.606 | 0.488 | 1.242     |
| 14  | {01010}+{00000,00010,00110,01011}+{00111} | red/red   | 0.008 | 0.005 | 1.583     | 0.443 | 0.639 | 0.693     |
| 13  | {01010}+{00000,00110,01110,01011}+{01111} | red/red   | 0.009 | 0.024 | 0.359     | 0.475 | 0.062 | 7.686     |
| 12  | {01010}+{00000,01000,01110,01011}+{01111} | red/red   | 0.009 | 0.024 | 0.359     | 0.475 | 0.062 | 7.686     |
| 11  | {00100}+{00000,01100,00110,00101}+{00111} | red/red   | 0.009 | 0.018 | 0.498     | 0.533 | 0.269 | 1.981     |
| 10  | {01001}+{00000,00001,01101,00111}+{00101} | red/red   | 0.014 | 0.014 | 1.018     | 0.288 | 0.313 | 0.920     |
| 9   | {00101}+{00000,01100,01101,00111}+{01111} | red/red   | 0.015 | 0.026 | 0.584     | 0.228 | 0.062 | 3.695     |
|     | {00101}+{00000,01100,00110,00111}+{01111} | red/blue  | 0.018 | 0.040 | 0.446     | 0.321 | 0.035 | 9.119     |
| 8   | {01101}+{00000,01001,00111,01111}+{01011} | red/red   | 0.019 | 0.003 | 6.623     | 0.068 | 0.800 | 0.085     |
| 7   | {01101}+{00000,01000,01001,01111}+{01011} | red/red   | 0.019 | 0.003 | 6.623     | 0.068 | 0.800 | 0.085     |
| 6   | {01001}+{00000,00001,01011,00111}+{00011} | red/red   | 0.019 | 0.005 | 3.571     | 0.153 | 0.689 | 0.222     |
| 5   | {01000}+{00000,01010,01110,01011}+{00110} | red/red   | 0.020 | 0.011 | 1.750     | 0.169 | 0.443 | 0.381     |
| 4   | {01000}+{00000,01100,01110,01111}+{00110} | red/red   | 0.020 | 0.011 | 1.750     | 0.169 | 0.443 | 0.381     |
| 3   | {01000}+{00000,01001,01011,01111}+{00111} | red/red   | 0.021 | 0.013 | 1.535     | 0.140 | 0.339 | 0.413     |
| 2   | {01100}+{00000,01000,01101,01111}+{01001} | blue/blue | 0.045 | 0.037 | 1.215     | 0.000 | 0.003 | 0.176     |
| 1   | {01001}+{00000,01000,01011,01111}+{01110} | blue/red  | 0.048 | 0.024 | 1.993     | 0.000 | 0.056 | 0.002     |
|     | {01100}+{00000,01000,01110,01111}+{01011} | blue/blue | 0.064 | 0.034 | 1.855     | 0.000 | 0.005 | 0.000     |
|     | {00010}+{00000,00011,01011,00111}+{00001} | blue/blue | 0.065 | 0.043 | 1.518     | 0.000 | 0.001 | 0.001     |
|     | {01100}+{00000,01101,00111,01111}+{01001} | blue/red  | 0.066 | 0.024 | 2.775     | 0.000 | 0.105 | 0.000     |
|     | {00001}+{00000,00101,01101,00111}+{01100} | blue/blue | 0.066 | 0.033 | 1.989     | 0.000 | 0.009 | 0.000     |
|     | {01001}+{00000,01011,00111,01111}+{00110} | blue/blue | 0.068 | 0.036 | 1.917     | 0.000 | 0.007 | 0.000     |
|     | {01100}+{00000,00110,01110,01111}+{01011} | blue/blue | 0.083 | 0.045 | 1.829     | 0.000 | 0.002 | 0.000     |
|     | {01100}+{00000,00110,00111,01111}+{01011} | blue/red  | 0.084 | 0.021 | 4.035     | 0.000 | 0.210 | 0.000     |

Table S9: Regressions over {0001}+{0000,1001,1011,0111}+{1111} for normalized lifespan data for Eble 0\*\*\*\* and Eble 1\*\*\*\*.

|           | Coefficient | Std. error | <i>t</i> -statistic | <i>p</i> -value |
|-----------|-------------|------------|---------------------|-----------------|
| $\beta_0$ | 0           | 0          | nan                 | nan             |
| $x_1$     | -0.0270     | 0.009      | -2.987              | 0.003           |
| $x_2$     | -0.0149     | 0.012      | -1.246              | 0.213           |
| $x_3$     | -0.0156     | 0.012      | -1.306              | 0.192           |
| $x_4$     | 0.2039      | 0.008      | 26.022              | 0.000           |
| $\beta_0$ | 0.2320      | 0.005      | 44.642              | 0.000           |
| $x_1$     | 0.0310      | 0.005      | 5.957               | 0.000           |
| $x_2$     | 0.0610      | 0.007      | 8.874               | 0.000           |
| $x_3$     | -0.0185     | 0.007      | -2.692              | 0.007           |
| $x_4$     | -0.0861     | 0.007      | -12.518             | 0.000           |
